# Supplementary material for: Constraining the geothermal parameters of in situ Rb–Sr dating on Proterozoic shales and their subsequent applications
Source: Copernicus journal article supplement (doi:10.5194/gchron-4-577-2022), 2022-09-06

## Altree 2: 504.0 m

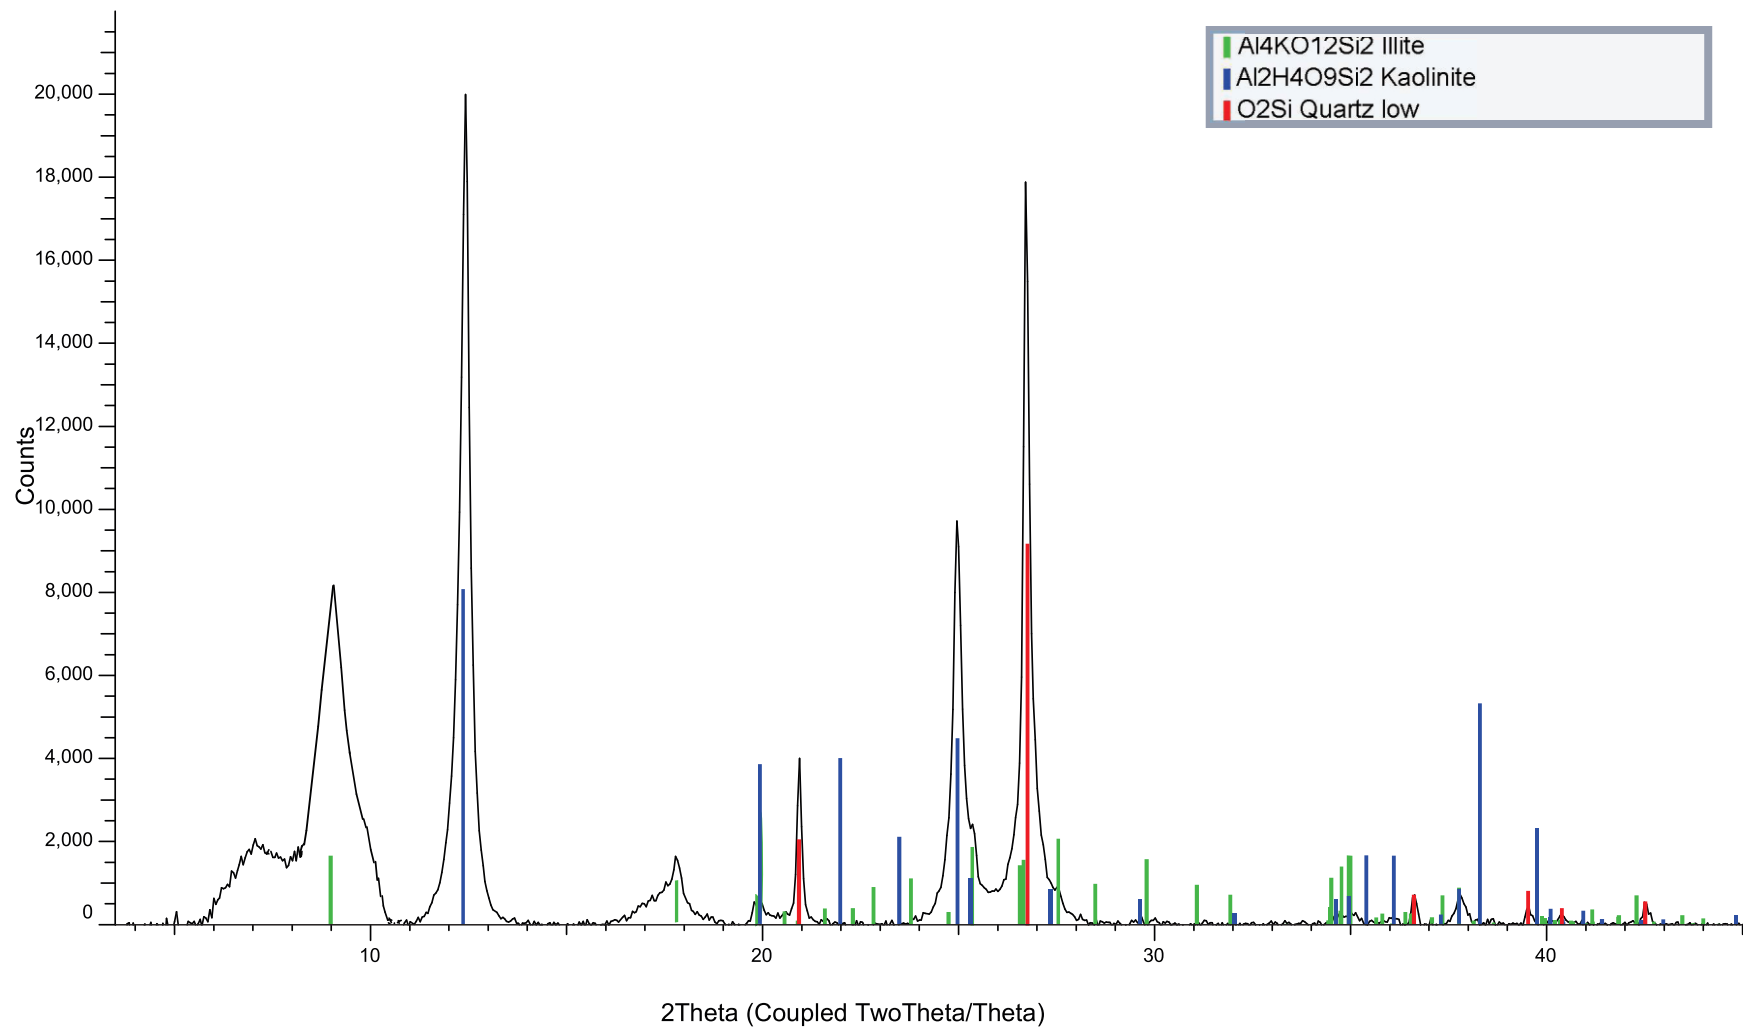

# Altree 2: 573.6m

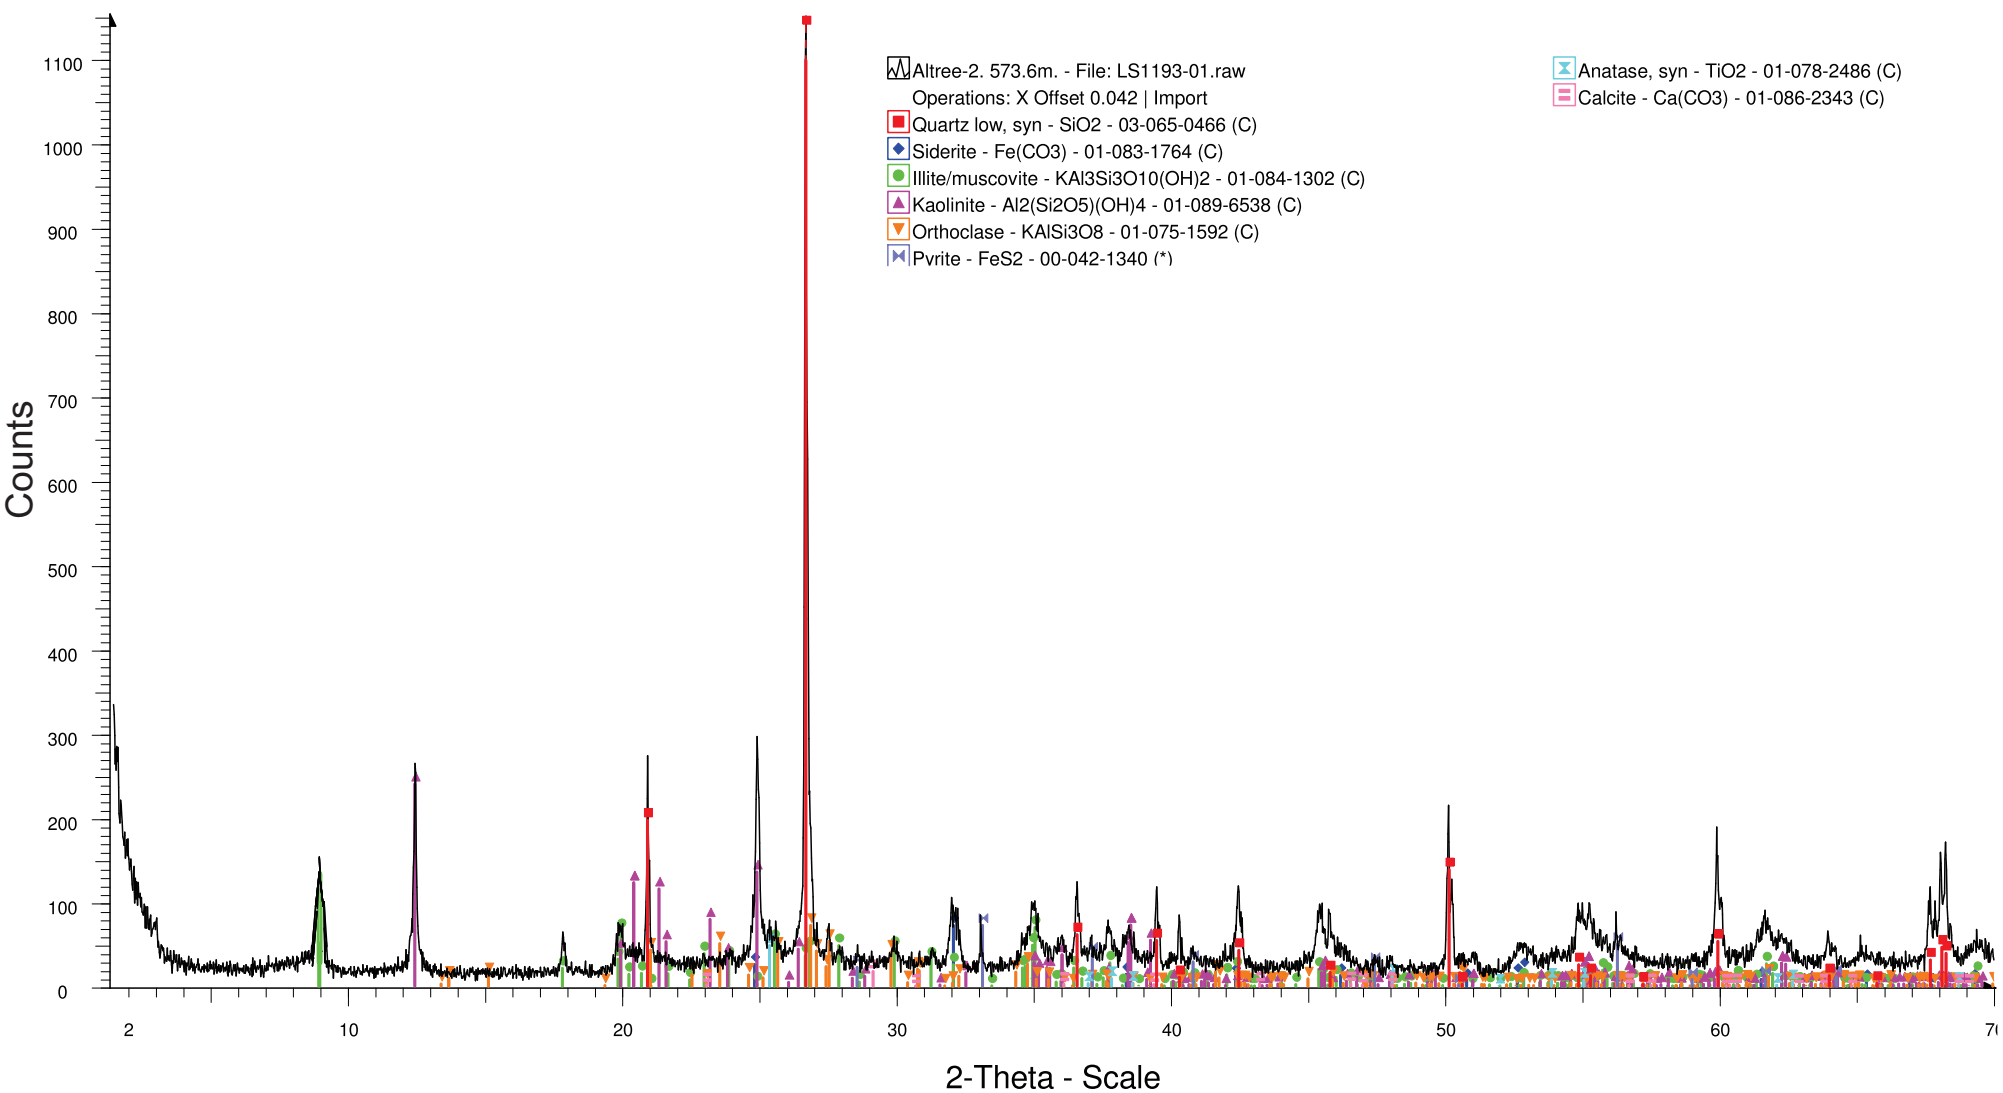

# Altree 2: 596.1 m

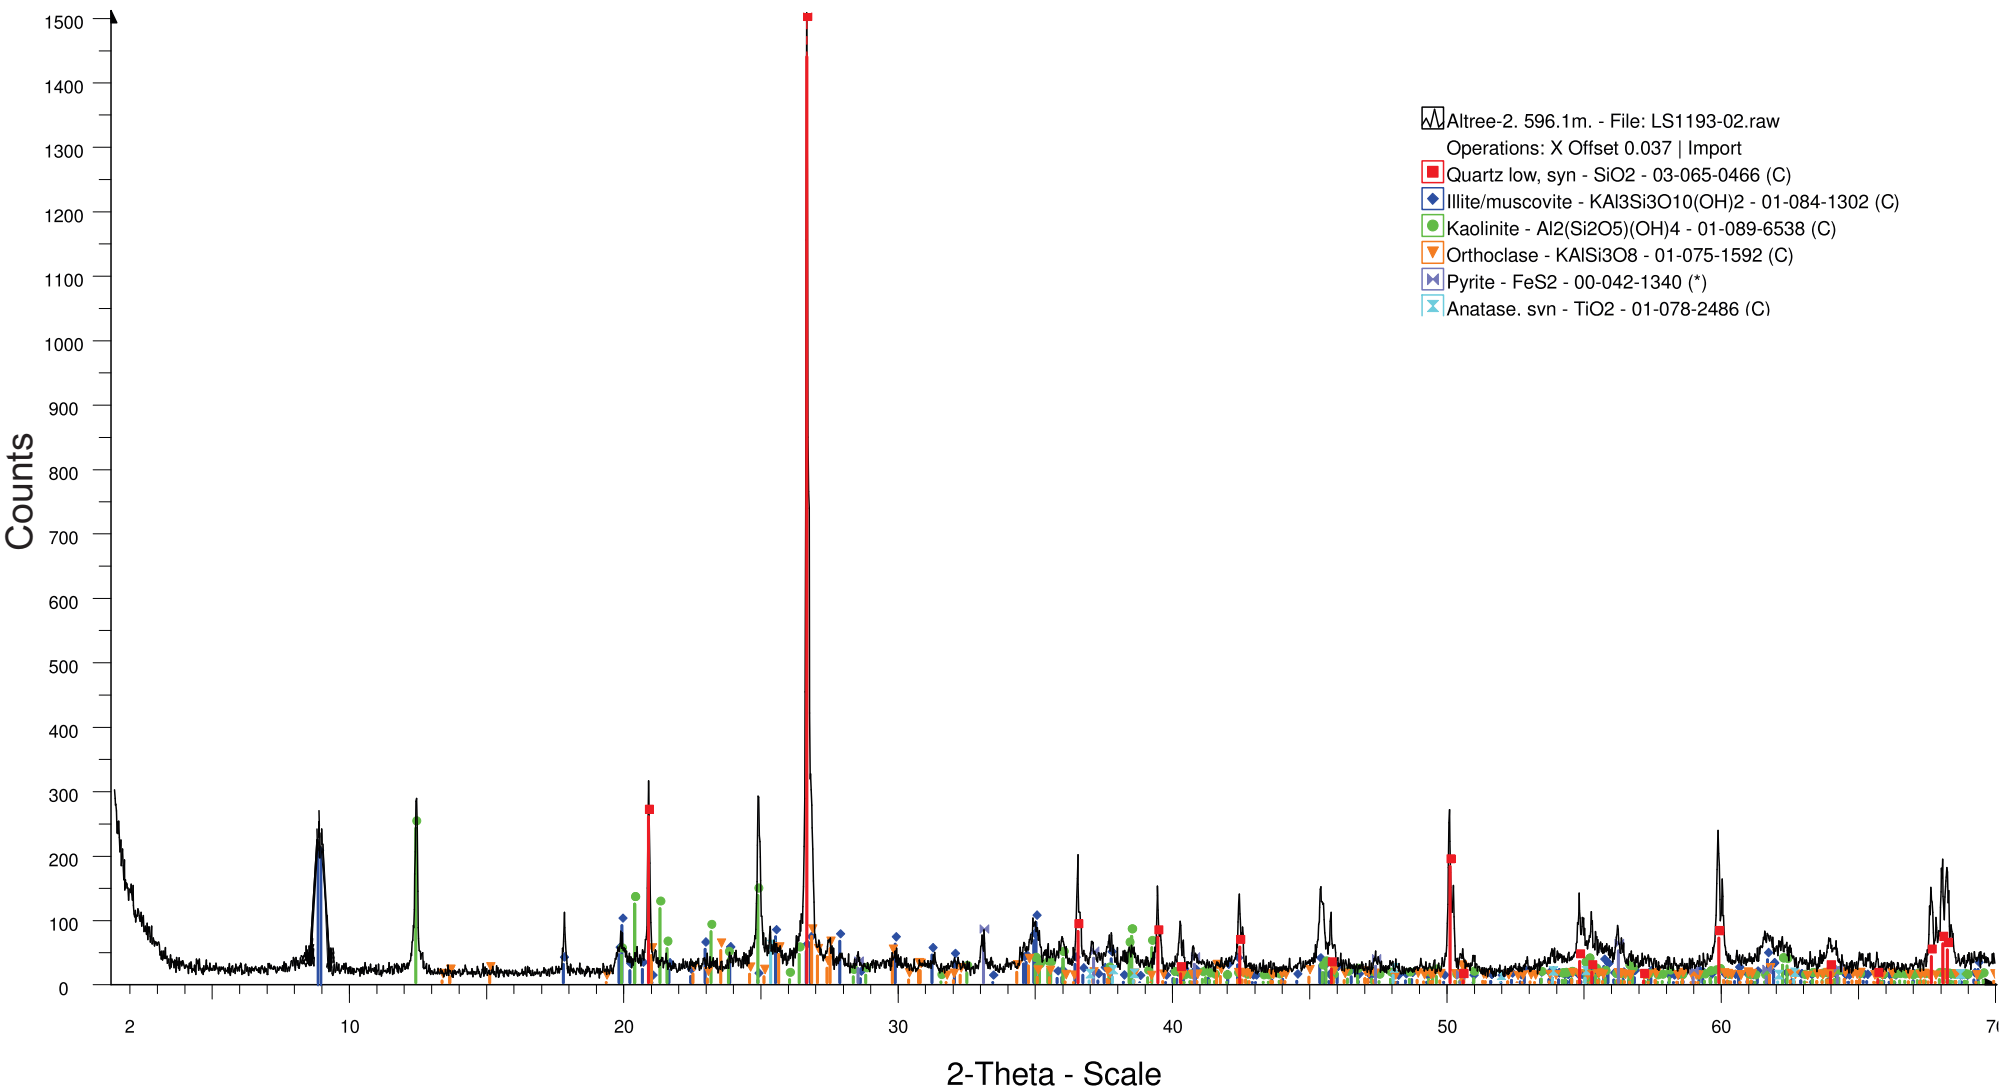

# Altree 2: 665.0 m

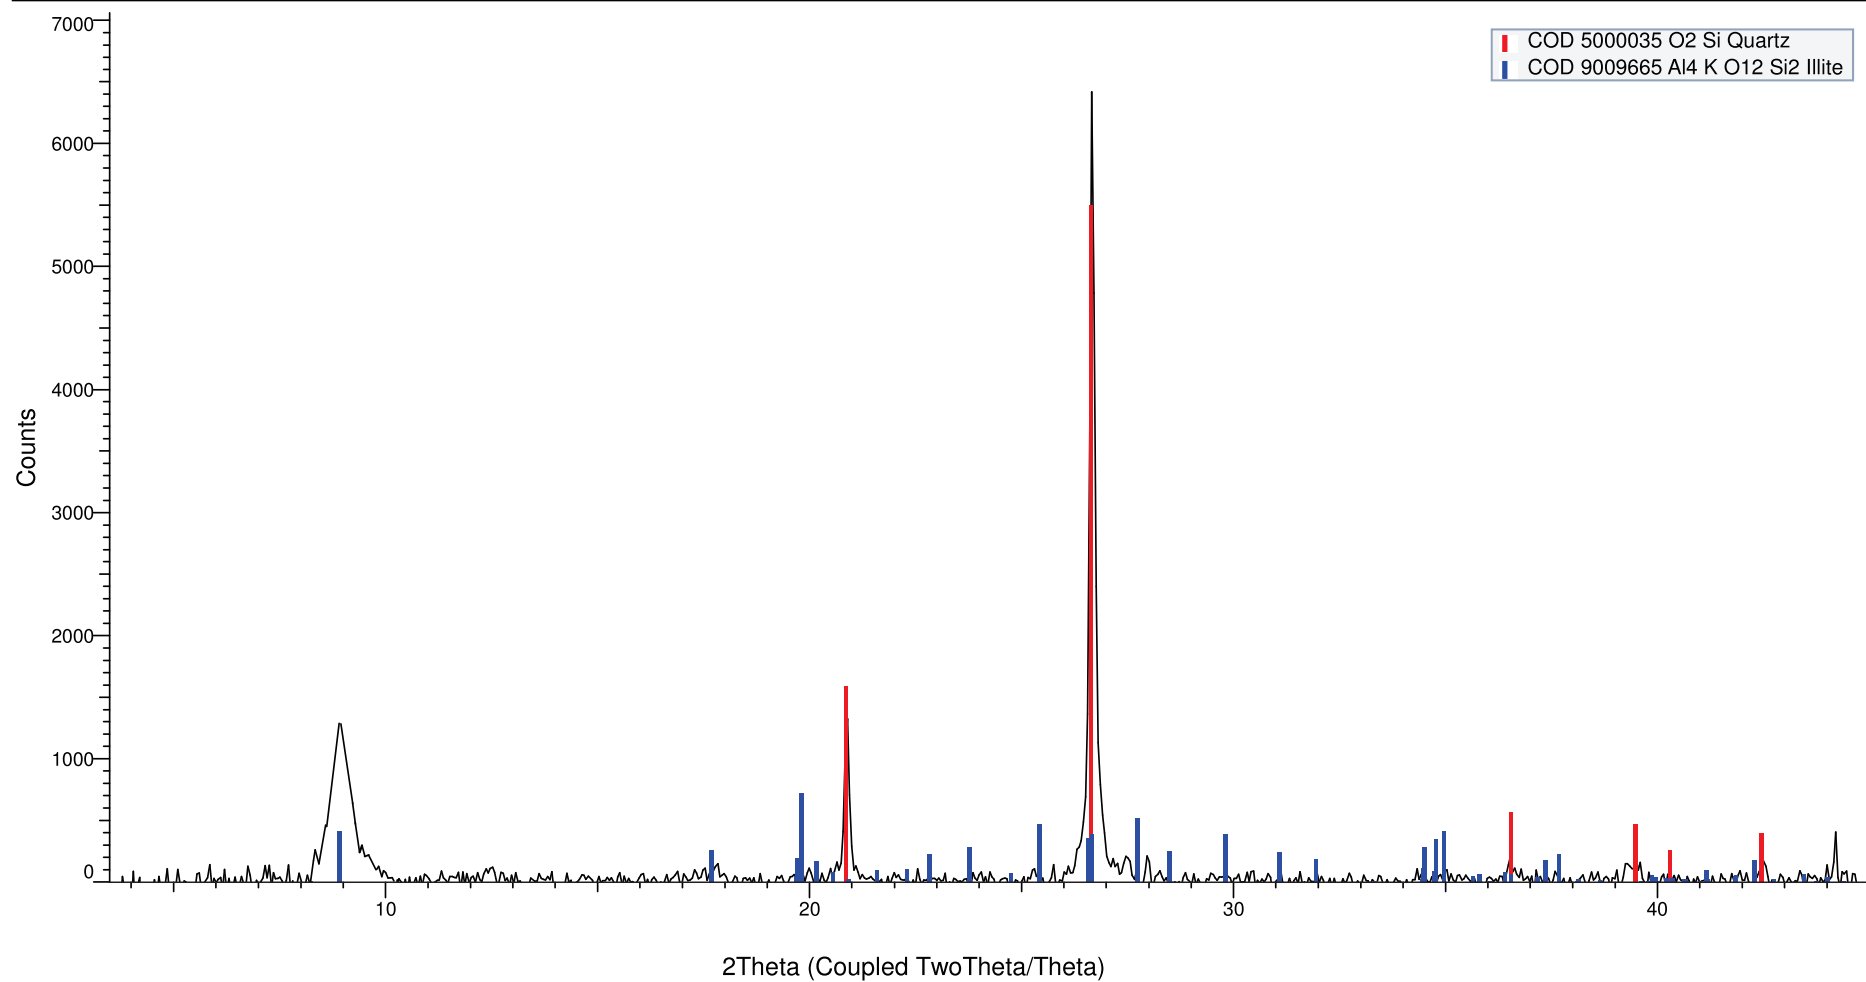

Altrec 2: 688.0 m

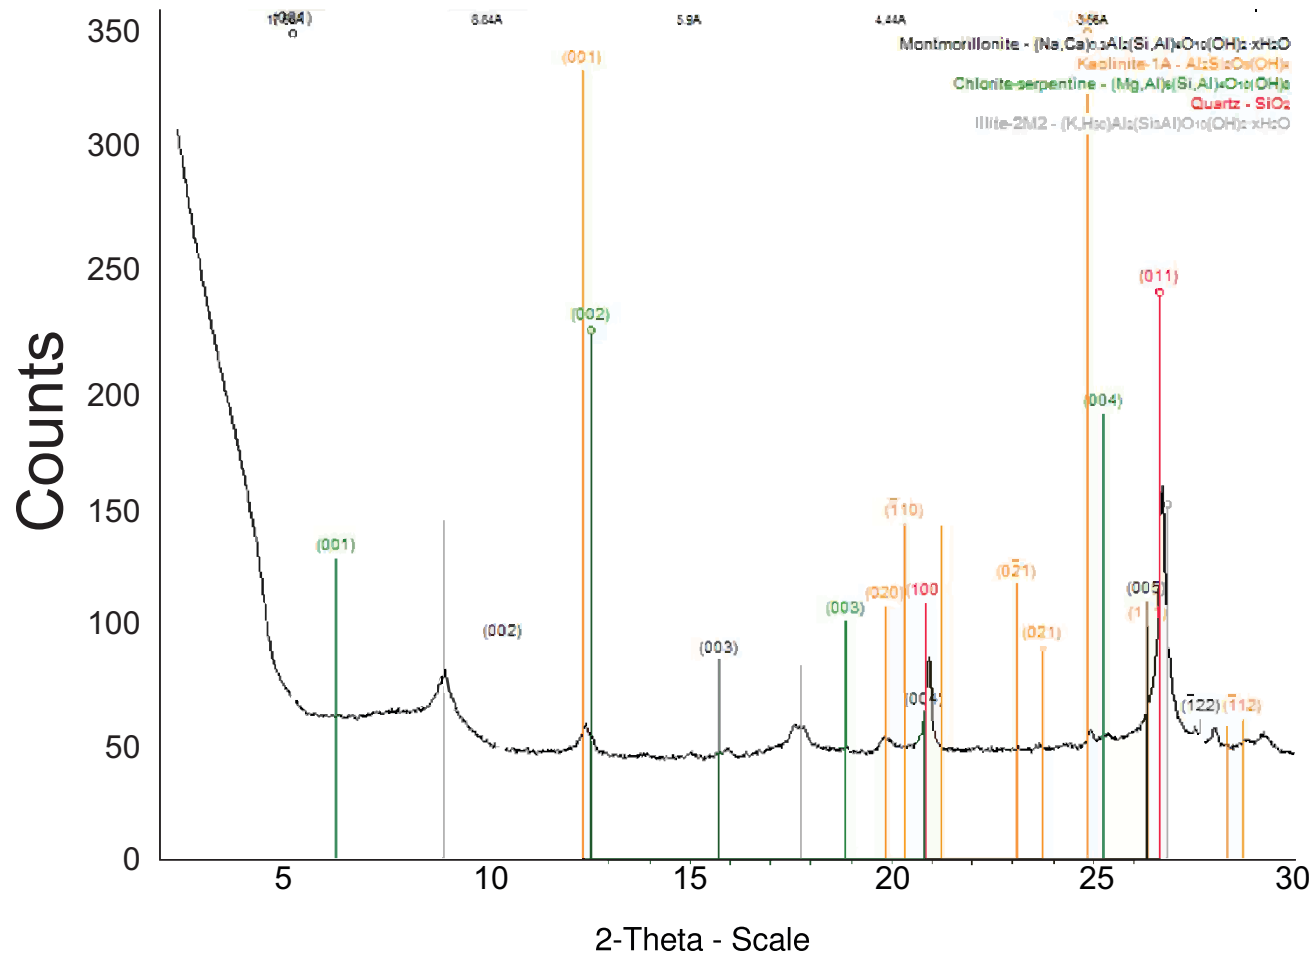

# Altree 2: 710.0 m

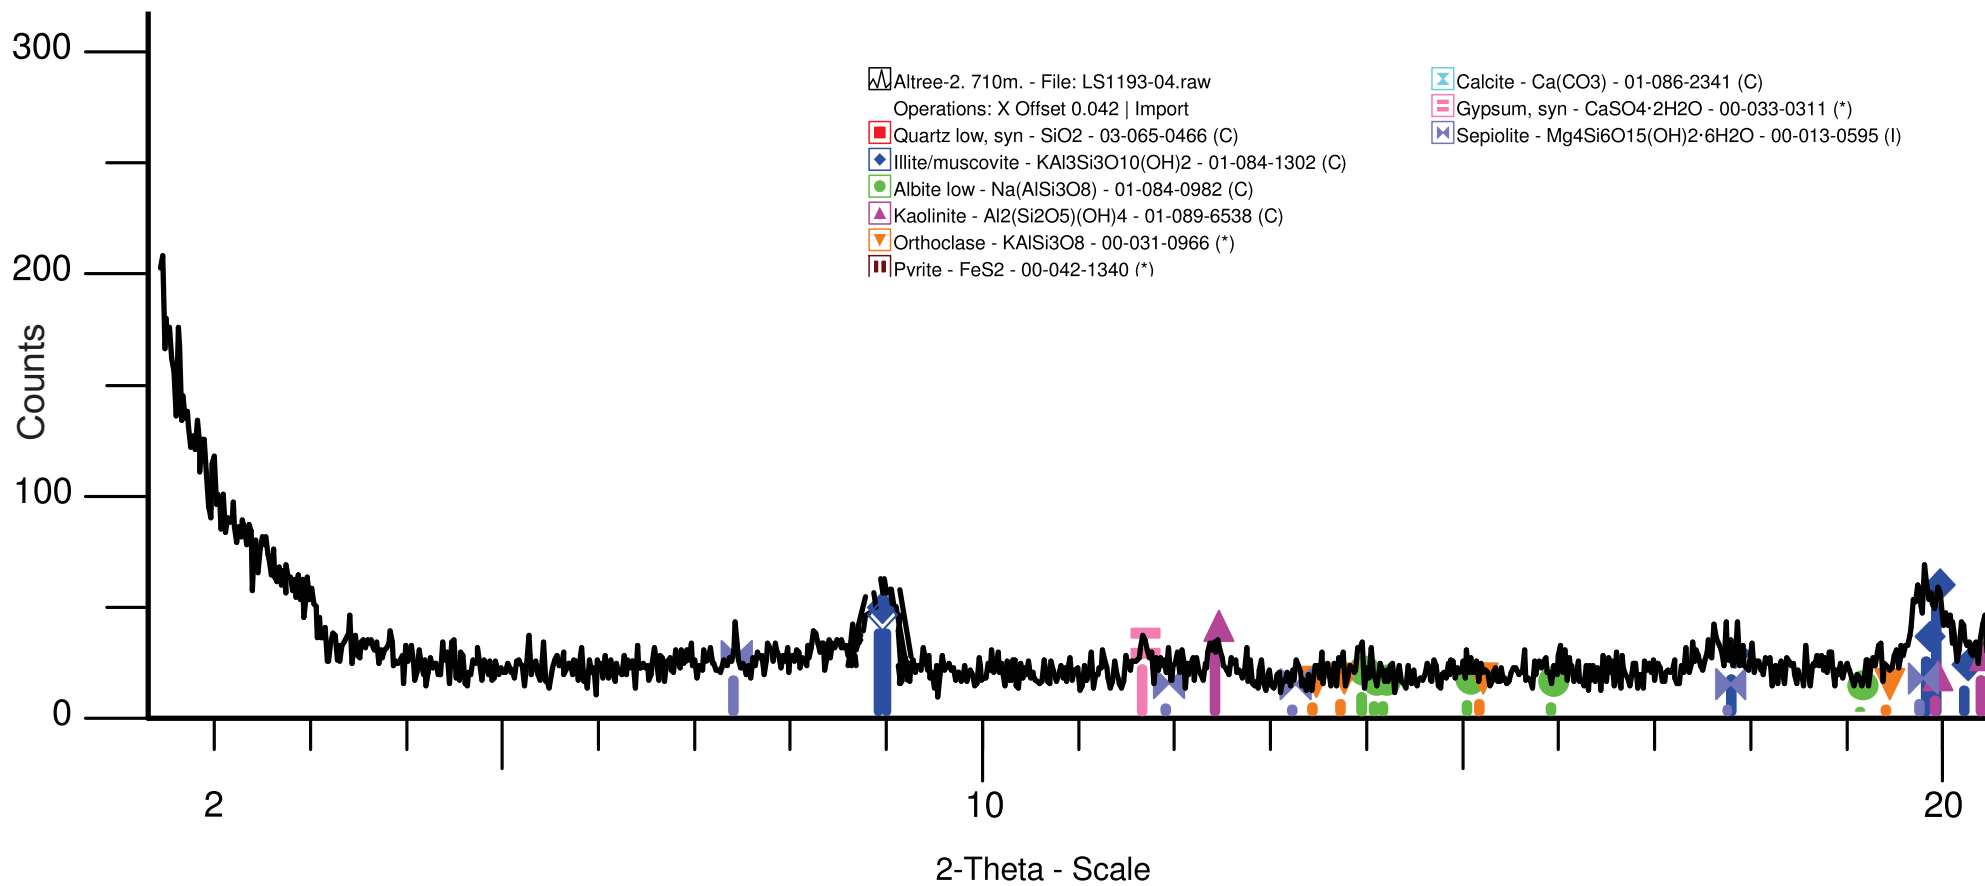

# Altree 2: 735.8 m

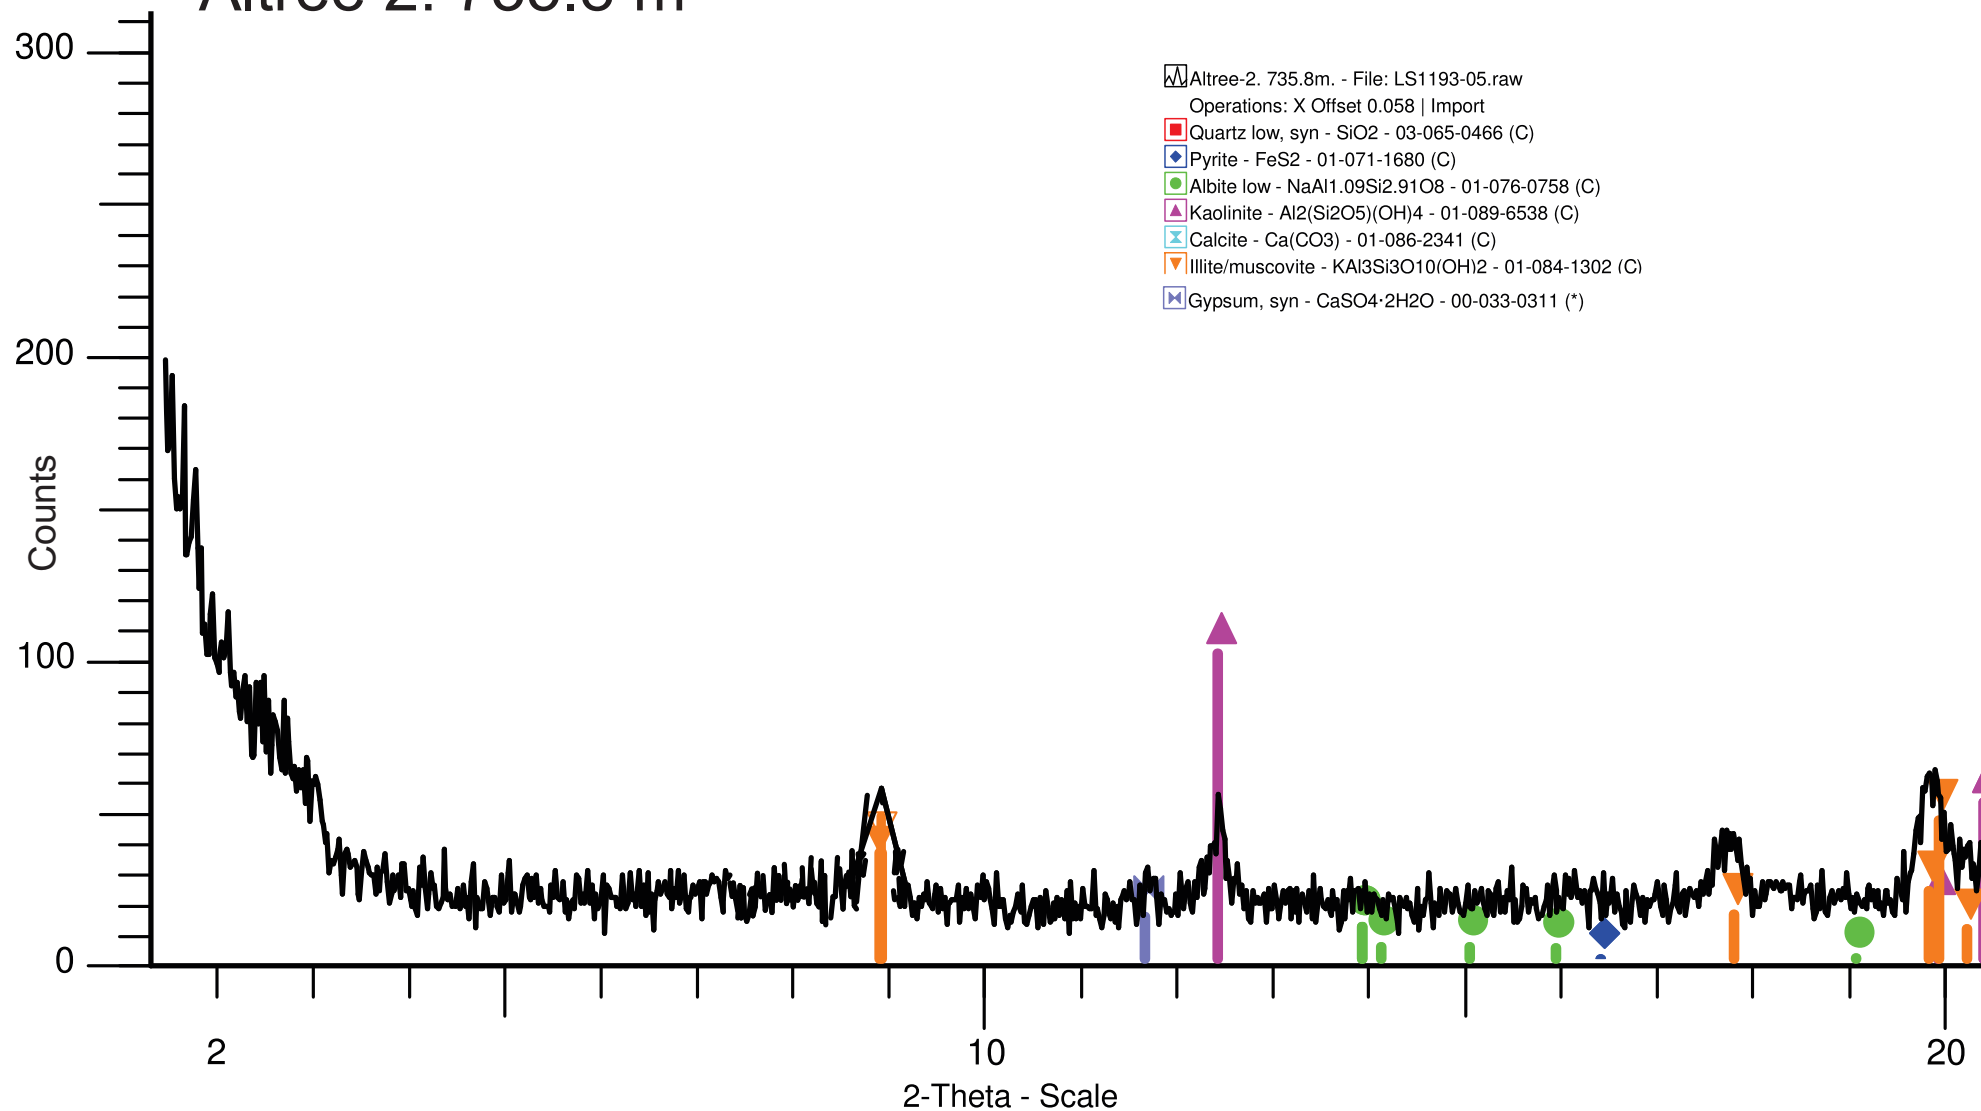

# Altree 2: 800.0 m

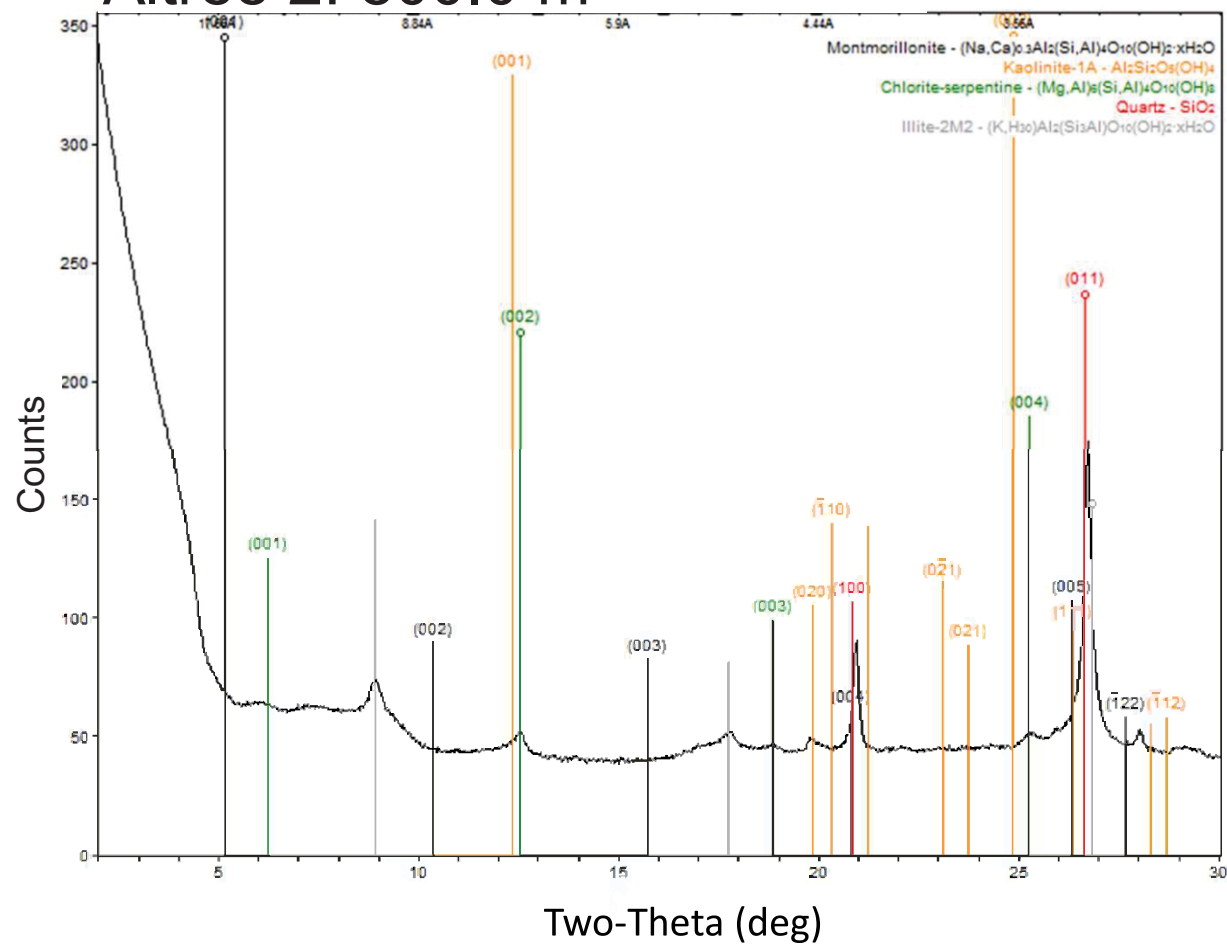



# Altrec 2: 822.0 m

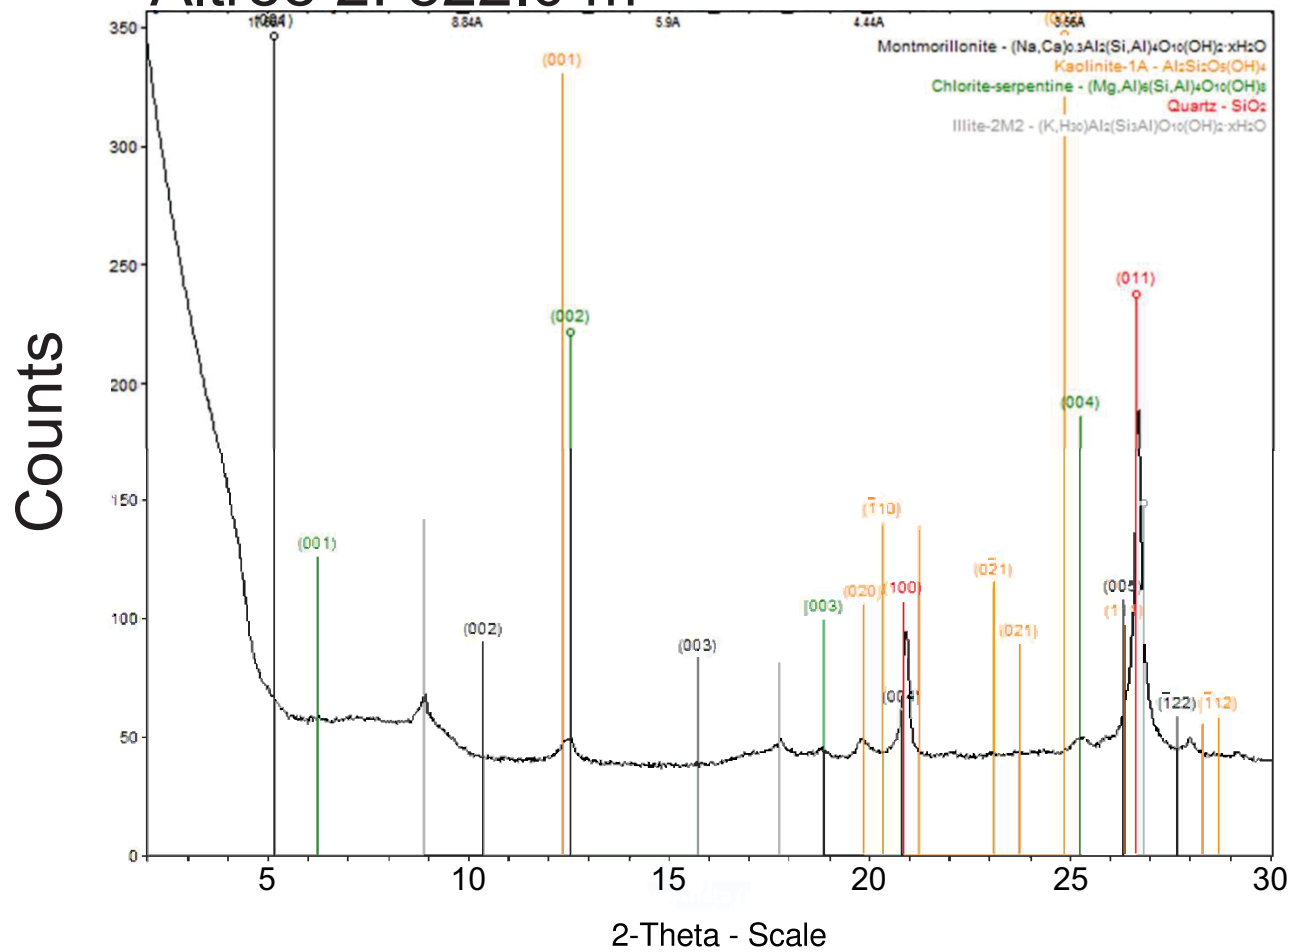

# Altrec 2: 863.0 m

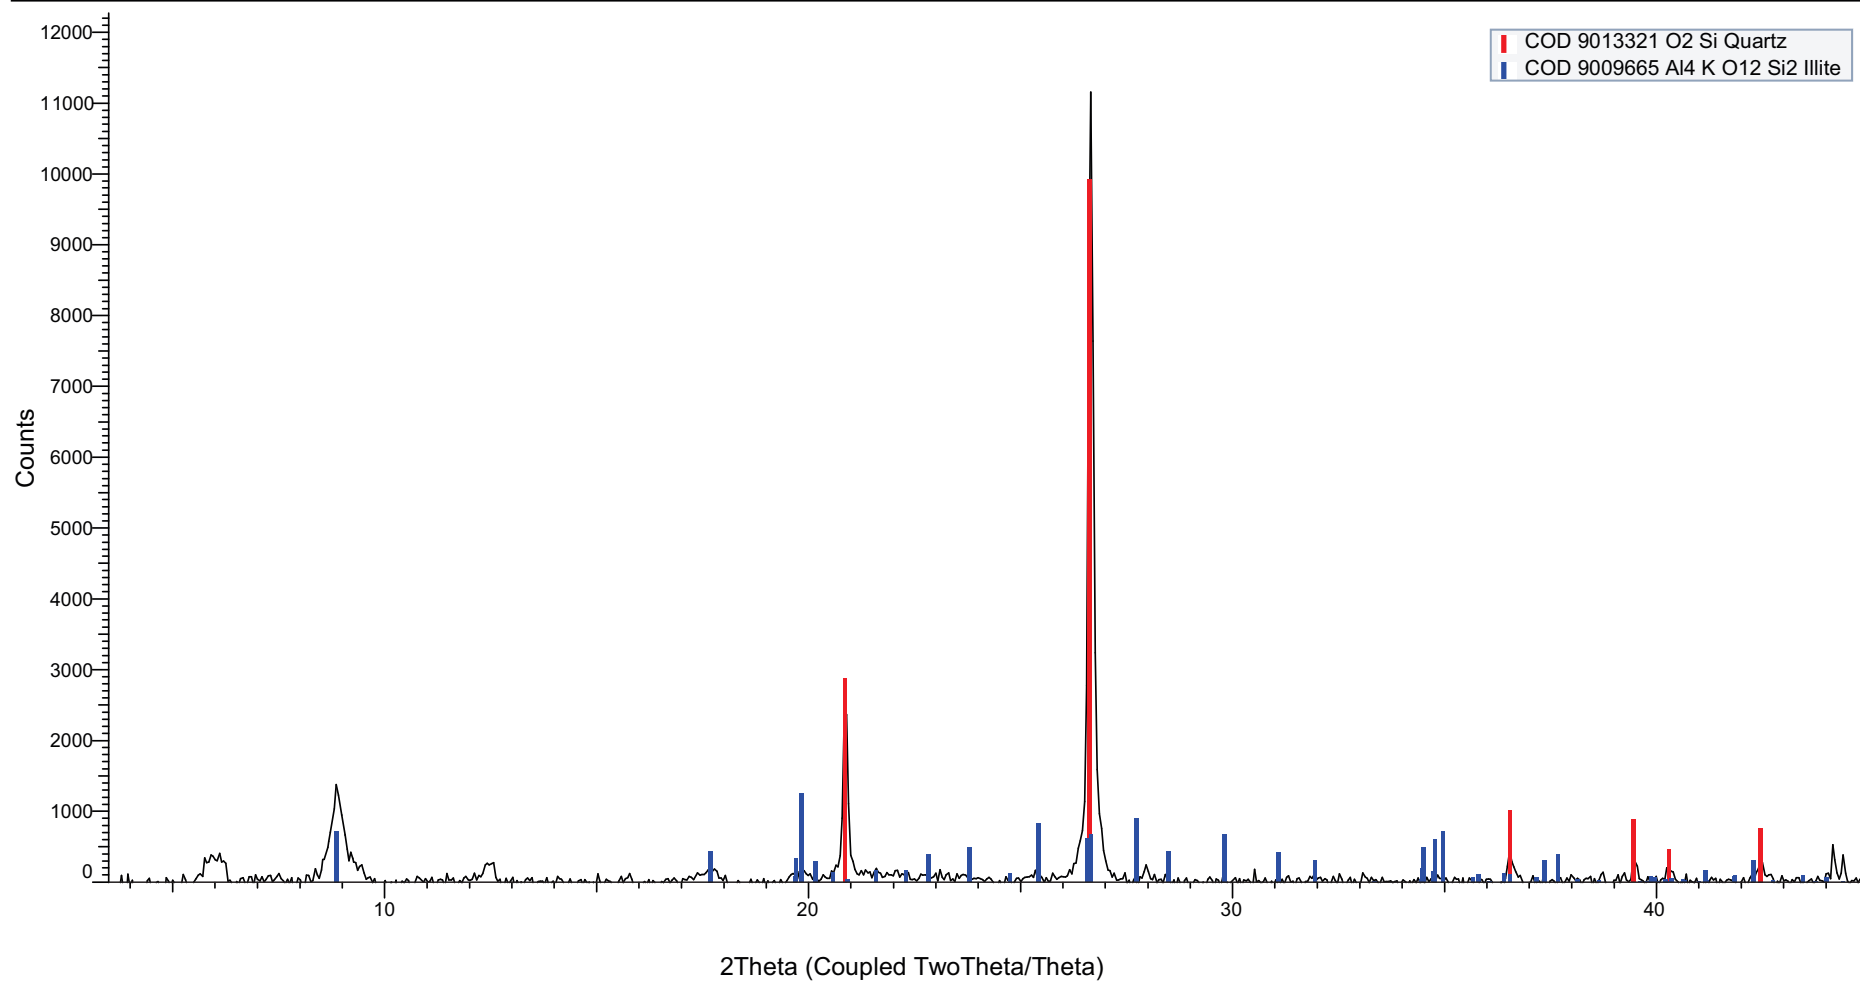

## Alt tree 2: 1110.0 m

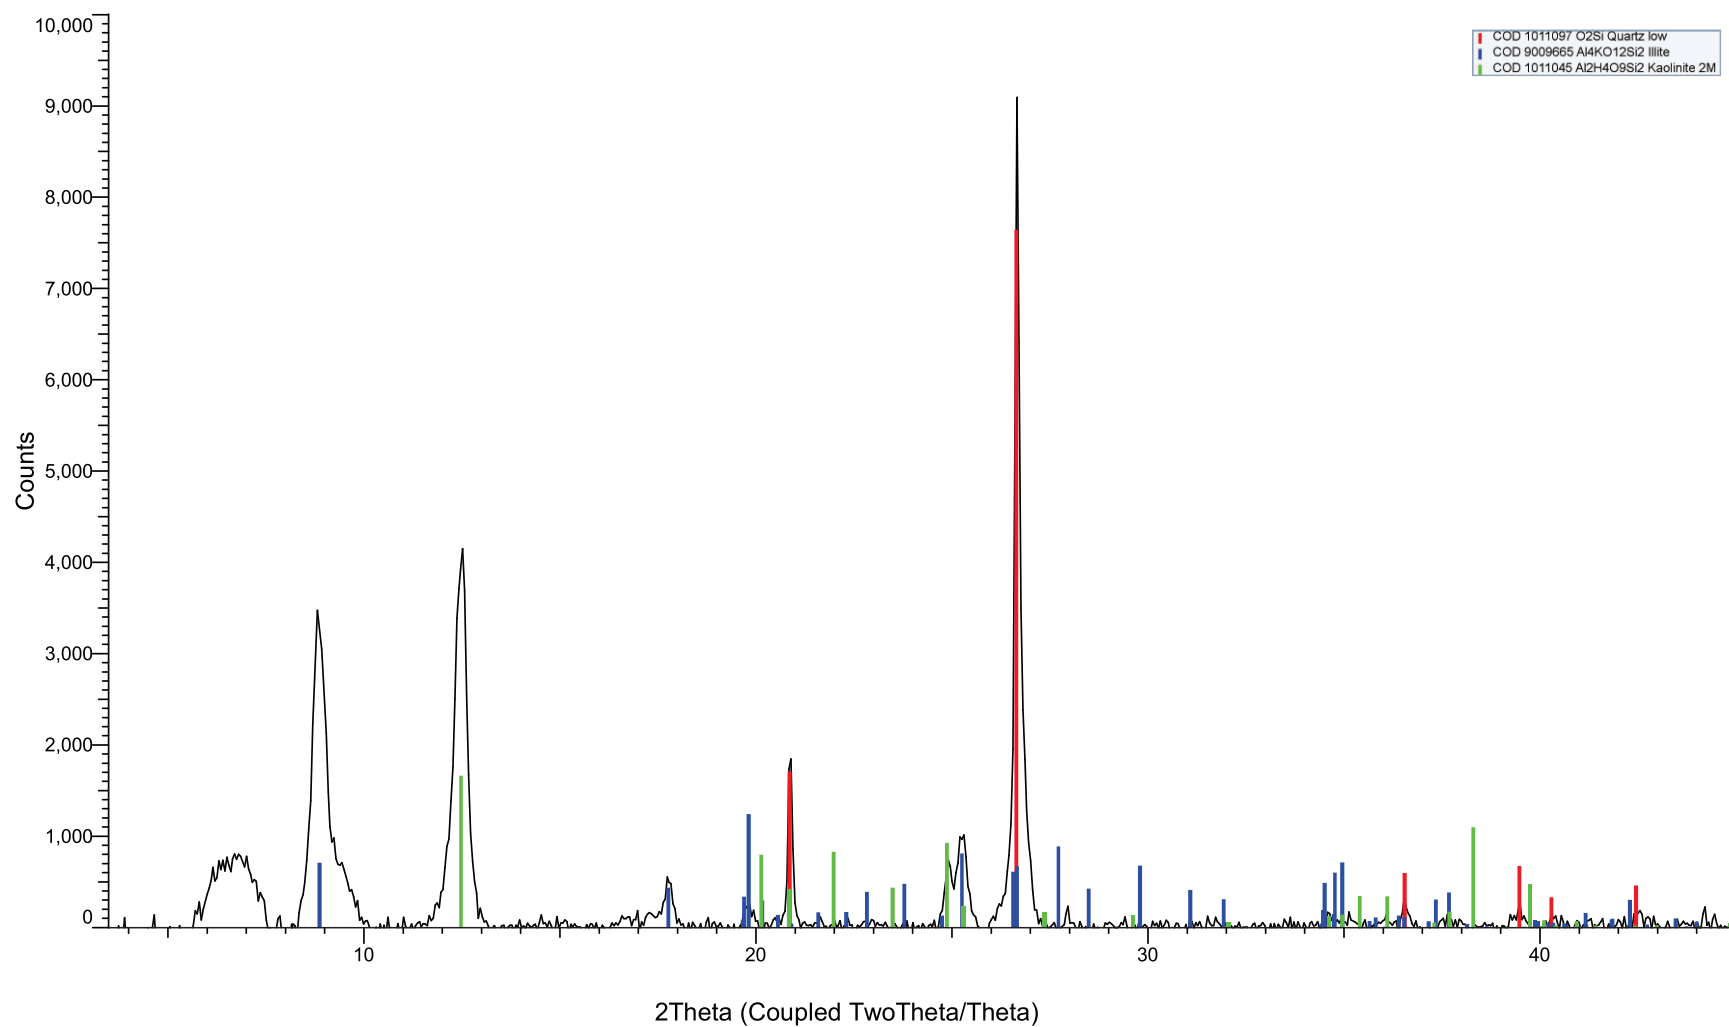

# Altree 2: 1121.1 m

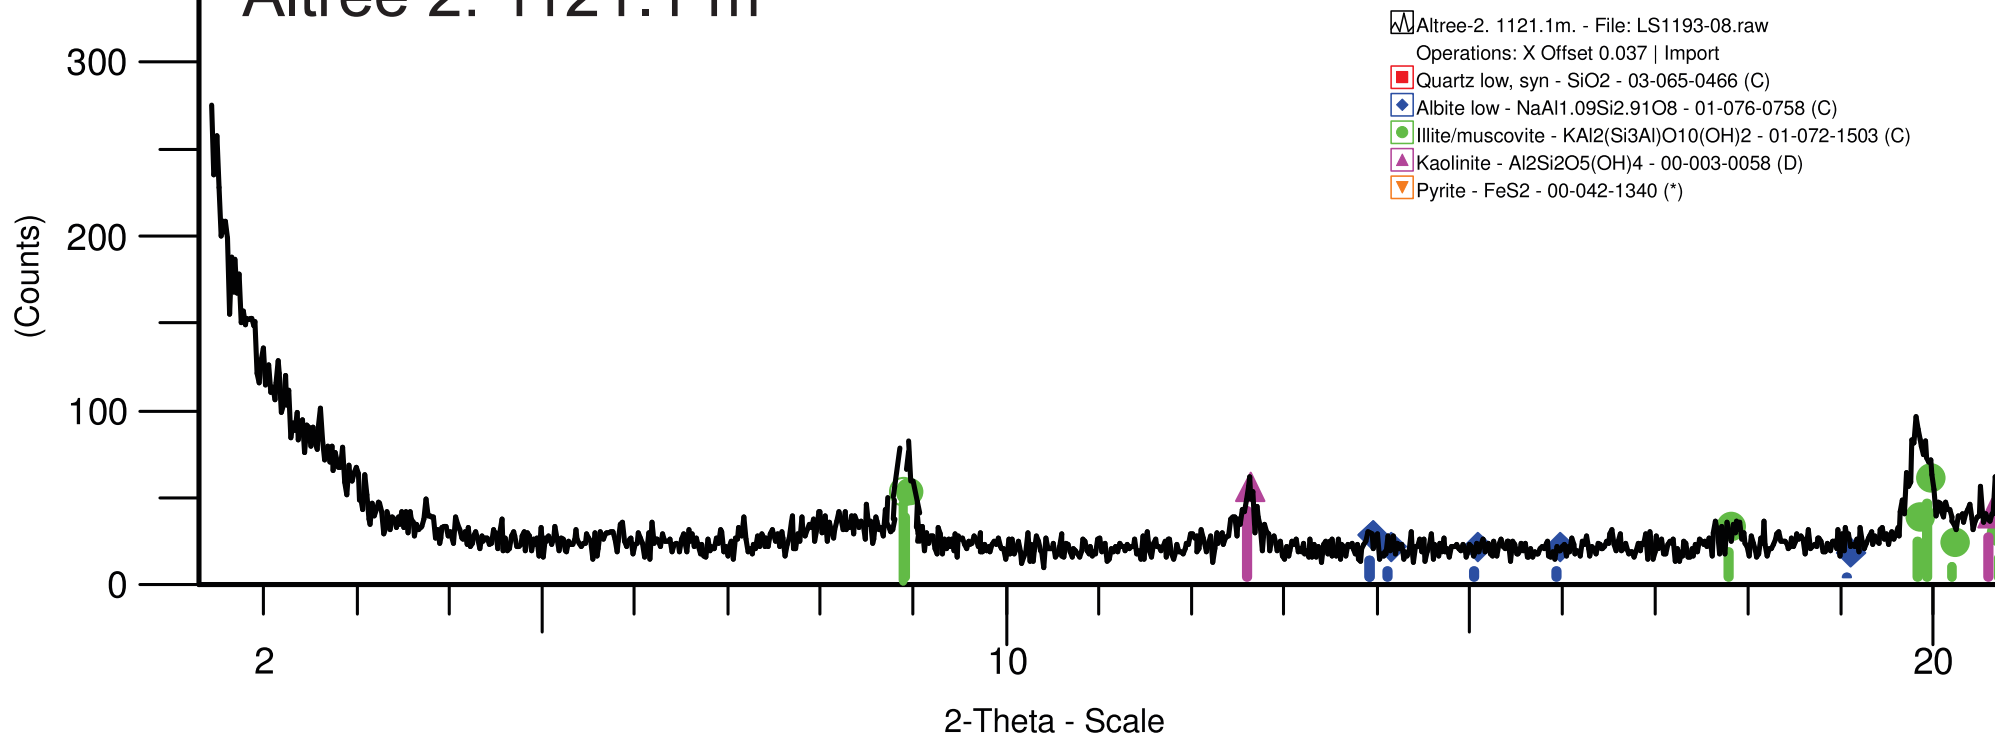

Supplement: Supplementary file 1 [file gchron-4-577-2022-supplement.zip]
