# Supplementary material for: Constraining the geothermal parameters of in situ Rb–Sr dating on Proterozoic shales and their subsequent applications
Source: Copernicus journal article supplement (doi:10.5194/gchron-4-577-2022), 2022-09-06
Supplement: Supplementary file 1 [file Supplementary Dataset.xlsx]

## Sheet: Table S2
Table S2B. XRF fused disk certified reference material values
Sample No	SiO2 (%)	TiO2 (%)	Al2O3 (%)	Fe2O3 (%)	MnO (%)	MgO (%)	CaO (%)	Na2O (%)	K2O (%)	P2O5 (%)	SO3 (%)	Sc (mg/kg)	V (mg/kg)	Cr (mg/kg)	Ni (mg/kg)	Cu (mg/kg)	Zn (mg/kg)	As (mg/kg)	Rb (mg/kg)	Sr (mg/kg)	Y (mg/kg)	Zr (mg/kg)	Nb (mg/kg)	Ba (mg/kg)	La (mg/kg)	Ce (mg/kg)	Nd (mg/kg)	Pb (mg/kg)
WG-1	52.9	1.8	14.6	11	0.2	7.7	8.4	3.2	0.9	0.3	<0.1	24	167	241	133	63	103	<20	28	349	24	132	22	229	<20	51	<20	<20
WG-1	52.9	1.8	14.6	11	0.2	7.7	8.4	3.2	0.8	0.3	<0.1	20	163	238	131	54	103	<20	24	347	24	131	<20	250	<20	<20	<20	<20
Average	52.9	1.8	14.6	11	0.2	7.7	8.4	3.2	0.85	0.3		22	165	239.5	132	58.5	103		26	348	24	131.5	22	239.5		51
St. dev	0	0	0	0	0	0	0	0	0.0707107	0		2.82843	2.82843	2.12132	1.41421	6.36396	0		2.82843	1.41421	0	0.707107		14.8492
Accepted	52.2	1.7	14.4	11.3	0.1	7.6	8.4	3.1	0.8	0.3		20	155		149	56	103		22	356	21	131	18	219	15	31	18	3
SBC-1	48.9	0.9	21.4	9.6	0.2	2.7	3	0.3	3.5	0.4	0.5	<20	232	109	54	35	188	26	147	180	35	131	20	817	36	107	42	35
SBC-1	49	0.9	21.5	9.6	0.2	2.7	3	0.3	3.5	0.4	0.5	<20	232	104	59	38	186	31	147	182	38	133	<20	811	42	98	41	32
Average	48.95	0.9	21.45	9.6	0.2	2.7	3	0.3	3.5	0.4	0.5		232	106.5	56.5	36.5	187	28.5	147	181	36.5	132	20	814	39	102.5	41.5	33.5
St. dev	0.0707107	0	0.0707107	0	0	0	0	0	0	0	0		0	3.53553	3.53553	2.12132	1.41421	3.53553	0	1.41421	2.12132	1.41421		4.24264	4.24264	6.36396	0.707107	2.12132
Accepted	47.6	0.9	21	9.7	0.2	2.6	3			0.4		20	220	109	82.8	31.2	186.8	25.7	147	178	36.5	134.3	15.3	788	52.5	108.2	49.2	35
Sco-1	64.7	0.6	14	5.1	0.1	2.8	2.6	1	2.8	0.2	0.2	<20	144	68	<20	42	101	<20	116	166	23	172	<20	589	<20	55	22	25
Sco-1	64.7	0.6	14	5.1	0.1	2.8	2.6	1	2.8	0.2	0.2	<20	134	66	<20	42	98	<20	114	166	24	174	<20	573	23	52	21	27
Average	64.7	0.6	14	5.1	0.1	2.8	2.6	1	2.8	0.2	0.2		139	67		42	99.5		115	166	23.5	173		581	23	53.5	21.5	26
St. dev	0	0	0	0	0	0	0	0	0	0	0		7.07107	1.41421		0	2.12132		1.41421	0	0.707107	1.41421		11.3137		2.12132	0.707107	1.41421
Accepted	62.8	0.6	13.7	5.1	0.1	2.7	2.6	0.9	2.8	0.2		11	131	68	27	29	103	12	112	174	26	160	11	570	30	62	26	31
Table S2B. XRF pressed pellet certified reference material values
Sample	F (mg/kg)	Cl (mg/kg)	Sc (mg/kg)	V (mg/kg)	Cr (mg/kg)	Co (mg/kg)	Ni (mg/kg)	Cu (mg/kg)	Zn (mg/kg)	Ga (mg/kg)	Ge (mg/kg)	As (mg/kg)	Se (mg/kg)	Rb (mg/kg)	Sr (mg/kg)	Y (mg/kg)	Zr (mg/kg)	Nb (mg/kg)	Mo (mg/kg)	Ag (mg/kg)	Cd (mg/kg)	Sn (mg/kg)	Sb (mg/kg)	Cs (mg/kg)	Ba (mg/kg)	La (mg/kg)	Ce (mg/kg)	Nd (mg/kg)	Yb (mg/kg)	Hf (mg/kg)	Ta (mg/kg)	W (mg/kg)	Pb (mg/kg)	Bi (mg/kg)	Th (mg/kg)	U (mg/kg)
WG-1	<10	154	18	143	216	42	137	60	98	17	<10	<10	<10	24	330	20	134	18	<10	<10	<10	<10	<10	<10	219	13	22	<10	<10	<10	<10	<10	<10	<10	<10	<10
WG-1	<10	167	17	141	220	41	138	61	98	18	<10	<10	<10	24	330	20	135	19	<10	<10	<10	<10	<10	<10	219	15	25	<10	<10	<10	<10	<10	<10	<10	<10	<10
WG-1	<10	164	18	141	220	42	139	60	99	17	<10	<10	<10	24	332	20	135	19	<10	<10	<10	<10	<10	<10	221	14	22	<10	<10	<10	<10	<10	<10	<10	<10	<10
Average		165.5	17.5	141	220	41.5	138.5	60.5	98.5	17.5				24	331	20	135	19							220	14.5	23.5
St. dev		2.12132	0.707107	0	0	0.707107	0.707107	0.707107	0.707107	0.707107				0	1.41421	0	0	0							1.41421	0.707107	2.12132
Accepted			20	155		45	149	56	103	19	1			22	356	21	131	18	2			2		1	219	15	31	18	2	3	3		3		2	1
SBC-1	<10	65	23	264	111	26	98	42	196	29	<10	31	<10	168	206	44	170	20	<10	<10	<10	<10	<10	12	776	63	136	61	<10	<10	<10	<10	47	<10	19	<10
SBC-1	109	68	21	268	112	27	100	42	197	30	<10	36	<10	168	207	44	170	20	<10	11	<10	<10	<10	12	773	70	151	67	<10	<10	<10	<10	47	<10	18	<10
SBC-1	236	74	24	269	108	26	101	43	197	30	<10	33	<10	170	208	44	171	20	<10	11	<10	<10	<10	10	776	65	142	66	<10	<10	<10	<10	47	<10	20	<10
Average	172.5	71	22.5	268.5	110	26.5	100.5	42.5	197	30		34.5		169	207.5	44	170.5	20		11				11	774.5	67.5	146.5	66.5					47		19
St. dev	89.8026	4.24264	2.12132	0.707107	2.82843	0.707107	0.707107	0.707107	0	0		2.12132		1.41421	0.707107	0	0.707107	0		0				1.41421	2.12132	3.53553	6.36396	0.707107					0		1.41421
Accepted			20	220	109	23	83	31	187	27		26	1	147	178	37	134	15	2				1	8	788	53	108	49	4	4	1	2	35	1	16	6
SCO-1	553	109	18	165	76	13	32	41	119	17	<10	18	<10	136	199	29	217	16	<10	16	<10	<10	<10	10	635	32	64	27	<10	<10	<10	<10	47	<10	11	<10
SCO-1	683	276	13	165	78	14	34	42	121	17	<10	19	<10	136	211	30	216	16	<10	21	<10	<10	<10	<10	639	32	72	37	<10	<10	<10	<10	46	<10	11	<10
SCO-1	1104	282	14	168	77	16	33	42	119	17	<10	18	<10	134	211	30	219	16	<10	20	<10	<10	<10	10	641	41	77	31	<10	<10	<10	<10	47	<10	12	<10
Average	893.5	279	13.5	166.5	77.5	15	33.5	42	120	17		18.5		135	211	30	217.5	16		20.5					640	36.5	74.5	34					46.5		11.5
St. dev	297.692	4.24264	0.707107	2.12132	0.707107	1.41421	0.707107	0	1.41421	0		0.707107		1.41421	0	0	2.12132	0		0.707107					1.41421	6.36396	3.53553	4.24264					0.707107		0.707107
Accepted	770	51	11	131	68	29	27	29	103	15		12	1	112	174	26	160	11	1			4	3	8	570	30	62	26	2	5	1	1	31		10	3
Table S2C. Q-ICP-MS traces certified reference material values
Sample	Be	Sc	V	Cr	Co	Ni	Cu	Zn	Ga	Ge	As	Rb	Sr	Y	Zr	Nb	Mo	Ag	Cd	Sn	Sb	Cs	Ba	La	Ce	Pr	Nd	Sm	Eu	Tb	Gd	Dy	Ho	Er	Yb	Lu	Hf	Ta	W	Pb	Bi	Th	U
	mg/Kg	mg/Kg	mg/Kg	mg/Kg	mg/Kg	mg/Kg	mg/Kg	mg/Kg	mg/Kg	mg/Kg	mg/Kg	mg/Kg	mg/Kg	mg/Kg	mg/Kg	mg/Kg	mg/Kg	mg/Kg	mg/Kg	mg/Kg	mg/Kg	mg/Kg	mg/Kg	mg/Kg	mg/Kg	mg/Kg	mg/Kg	mg/Kg	mg/Kg	mg/Kg	mg/Kg	mg/Kg	mg/Kg	mg/Kg	mg/Kg	mg/Kg	mg/Kg	mg/Kg	mg/Kg	mg/Kg	mg/Kg	mg/Kg	mg/Kg
WG-1	1	4.2	161	259	46.3	167	51.5	108	19.6	1.4	1.1	22.3	331	18.2	128	17.5	1.9	1.1	<0.7	1.7	<0.7	0.8	208	14.7	31	4	17.6	4.7	1.6	0.7	4.7	4.1	0.8	2	1.6	<0.7	3.3	2.7	1.4	3.5	<0.7	1.9	<0.7
WG-1	0.9	4.9	158	258	46.5	162	50.2	113	19.6	1.4	1.4	21.8	337	17.6	128	18	1.8	<0.7	<0.7	1.5	<0.7	0.8	210	14.9	31	3.9	16.9	4.3	1.5	0.7	4.7	3.9	0.8	2.1	1.6	<0.7	3.3	2.6	1.5	3.5	<0.7	2.1	<0.7
WG-1	1	5.9	159	257	46	161	49.9	106	19.2	1.3	1.6	22.6	341	18.3	126	17.4	1.7	<0.7	<0.7	1.9	<0.7	0.8	209	14.6	30.7	4	17.3	4.2	1.5	<0.7	4.5	4.3	0.8	1.9	1.6	<0.7	3.3	2.6	1.3	3.4	<0.7	2	<0.7
WG-1	1.2	4.6	159	255	44.8	162	49.9	105	18.9	1.6	1.2	22.5	336	17.9	127	17.5	1.7	<0.7	<0.7	1.7	<0.7	0.8	209	14.7	30.8	3.9	17.3	4	1.5	0.8	4.6	4.1	0.7	2	1.5	<0.7	3.3	2.5	1.2	3.5	<0.7	1.9	<0.7
WG-1	1.2	4.9	157	252	44.8	161	49.9	101	18.6	1.5	1.2	20.9	332	17.9	124	17.4	1.7	<0.7	<0.7	1.8	<0.7	0.8	205	14.3	30.3	3.9	17.2	4.1	1.6	0.7	4.6	4	0.8	1.8	1.6	<0.7	3.2	2.6	1.2	3.5	<0.7	2	<0.7
WG-1	1	5	157	254	45.2	161	51	105	19.4	1.4	1.2	22	330	17.5	124	17.3	1.5	<0.7	<0.7	1.5	<0.7	0.8	202	15	30.3	3.8	17.2	3.9	1.5	<0.7	4.6	4.2	0.7	1.9	1.5	<0.7	3.2	2.6	1.4	3.3	<0.7	2	<0.7
WG-1	1	5.4	159	256	45.3	165	50.9	108	19.3	1.4	1.2	22.3	335	18.2	124	17.7	1.4	<0.7	<0.7	2	<0.7	0.8	203	14.4	30.4	4	17.4	4.3	1.6	0.7	4.6	4	0.8	2	1.6	<0.7	3.3	2.6	1.6	3.5	<0.7	2	<0.7
WG-1	1.4	5.4	158	254	45.3	164	51.2	105	18.4	1.3	1.4	21.8	329	17.6	125	17.2	1.6	<0.7	<0.7	1.7	<0.7	0.8	200	15	30.2	3.9	16.9	4	1.5	0.7	4.5	4.3	0.7	1.9	1.5	<0.7	3.2	2.6	1.4	3.4	<0.7	2	<0.7
WG-1	1.1	6	158	252	45.4	161	49.8	105	18.6	1.5	1.3	20.8	333	17.9	127	17.5	1.6	<0.7	<0.7	1.9	<0.7	0.7	212	14.8	30.4	3.9	16.8	3.9	1.4	0.7	4.5	4.2	0.8	1.9	1.5	<0.7	3.1	2.7	1.3	3.5	<0.7	2	<0.7
WG-1	1.2	6	160	257	46.5	166	51.2	108	18.3	1.5	1.4	21.5	336	17.7	126	18.1	1.4	<0.7	<0.7	1.4	<0.7	0.8	210	14.5	30.8	3.9	16.8	4.1	1.6	0.7	4.6	4.1	0.8	2	1.6	<0.7	3.2	2.6	1.5	3.5	<0.7	1.9	<0.7
WG-1	1.5	6.4	163	257	46.3	166	51	108	19.3	1.4	1.5	22.1	341	17.6	126	17.5	1.3	<0.7	<0.7	1.6	<0.7	0.8	208	14.3	30.4	3.9	16.8	4.3	1.5	0.7	4.7	4.2	0.7	2	1.5	<0.7	3.2	2.6	1.3	3.3	<0.7	2.1	<0.7
WG-1	1.4	6.3	160	260	46.6	165	52.1	107	19.9	1.3	1.4	21.3	341	18	130	18.3	1.6	<0.7	<0.7	2.1	<0.7	0.9	215	14.5	31.4	4	17.5	3.8	1.5	0.7	4.6	4.1	0.8	2	1.6	<0.7	3.3	2.6	1.3	3.5	<0.7	2.1	<0.7
WG-1	1.2	6.4	163	262	46.4	165	53.4	105	19.5	1.6	1.5	22.9	340	17.8	128	17.9	1.8	<0.7	<0.7	1.7	<0.7	0.9	216	14.7	31	4.2	17.4	4.6	1.6	<0.7	4.7	4.1	0.8	2	1.6	<0.7	3.1	2.7	1.3	3.3	<0.7	2	<0.7
WG-1	1.2	6.7	162	263	46.3	168	52.4	107	19.5	1.5	1.7	22	341	18.4	127	18.2	2	<0.7	<0.7	1.8	<0.7	0.8	214	14.9	31.2	4.1	18.1	4.1	1.6	0.8	4.6	4.2	0.8	2.1	1.5	<0.7	3.2	2.7	1.8	3.6	<0.7	2.1	0.7
WG-1	1.5	6.9	161	264	46.6	165	53.3	109	19.5	1.5	1.4	23.4	343	18.3	128	18.3	1.4	<0.7	<0.7	1.6	<0.7	0.8	213	15.3	31.2	4	16.9	4.2	1.5	0.7	4.6	4.2	0.8	2.1	1.5	<0.7	3.2	2.7	1.4	3.5	<0.7	2.1	<0.7
Average	1.18667	5.66667	159.667	257.333	45.8867	163.933	51.18	106.667	19.1733	1.44	1.36667	22.0133	336.4	17.9267	126.533	17.72	1.62667	1.1		1.72667		0.806667	208.933	14.7067	30.74	3.96	17.2067	4.16667	1.53333	0.716667	4.60667	4.13333	0.773333	1.98	1.55333		3.22667	2.62667	1.39333	3.45333		2.01333	0.7
St. dev	0.19223	0.819117	1.98806	3.73529	0.671743	2.40436	1.18876	2.66369	0.492032	0.0985611	0.167616	0.70899	4.62601	0.296327	1.76743	0.378342	0.20166			0.194447		0.0457738	4.78788	0.284019	0.386929	0.0985611	0.369298	0.249762	0.0617213	0.0389249	0.0703732	0.11127	0.0457738	0.0861892	0.0516398		0.0703732	0.0593617	0.157963	0.0915475		0.0743223
Accepted		19.56	155		44.6	149	56.1	103	19.37	1.336		22.25	356	20.82	131	18.24	1.7			1.649		0.813	219	15.4	31.3	4.07	17.87	4.453	1.56	0.738	4.664	4.203	0.786	2.073	1.675	0.235	3.316	2.91		3.383		2.49	0.674
SBC-1	3.3	13	224	114	22.4	84	27.4	200	27.5	2.1	25.8	148	178	28.3	134	15.2	2.5	1.4	<0.7	3.4	1.1	8.3	767	49.7	107	12.2	47.7	9	1.8	1.2	7.6	6.4	1.2	3.5	3.1	<0.7	4	1	2.1	35.4	<0.7	13.3	5.8
SBC-1	3.3	13.7	226	114	22.6	84	26.1	195	26.7	2	24.5	149	181	29.4	137	15.2	2.4	0.7	<0.7	3.1	0.8	8.3	778	49.8	107	12.1	47	9.1	1.8	1.1	7.6	6.3	1.2	3.5	3.4	<0.7	3.8	1	2	35.3	<0.7	13	5.7
SBC-1	3.1	14.9	226	115	22.5	86.1	26.2	193	27.5	2	24.4	146	179	29.9	133	15.5	2.3	<0.7	<0.7	3.1	0.7	8.4	776	49.8	107	12.4	47.4	8.6	1.8	1.1	7.7	6.6	1.3	3.6	3.3	<0.7	4	1	1.9	35.7	<0.7	13.3	5.7
SBC-1	3.5	15.3	227	113	22.3	85.6	26.1	193	27.7	2	24.7	150	182	30	136	15.3	2.5	0.7	<0.7	3.2	<0.7	8.4	770	49.4	107	12.2	47.1	9.3	1.9	1.2	7.5	6.8	1.3	3.6	3.3	<0.7	3.8	1	2	35.4	<0.7	13.4	5.6
SBC-1	3.5	15.1	226	113	22.5	86.9	25.5	200	27.1	1.9	24.2	149	181	29.9	134	15.1	2.2	<0.7	<0.7	2.8	0.8	8.1	774	48.8	107	12.4	47	9	1.7	1.1	7.6	6.4	1.2	3.6	3.4	<0.7	3.8	1	1.9	34.9	<0.7	13	5.8
SBC-1	3.5	15.3	223	111	23.1	85.6	26.1	192	28.6	1.8	25	146	181	29.5	132	15.1	2	<0.7	<0.7	3.1	0.8	8.2	762	50	105	12.3	47.4	9.2	1.7	1.1	7.6	6.3	1.2	3.5	3.2	<0.7	3.7	1	2	35.8	<0.7	13.2	5.7
SBC-1	3.2	15.7	226	112	22.9	84.4	25.2	196	27.2	2	25	147	182	29.1	135	15.5	2.7	<0.7	<0.7	3.4	0.8	8.1	762	48.6	106	12.3	46.9	8.9	1.8	1.1	7.5	6.5	1.3	3.6	3.3	<0.7	3.7	1	1.9	35.3	<0.7	13.2	5.7
SBC-1	3.2	16.1	226	112	22.7	83.9	26	189	25.7	2.2	24.4	143	177	28.5	130	15.3	2.3	<0.7	<0.7	3.2	<0.7	8.3	755	48.7	105	12.1	46.8	8.8	1.7	1.1	7.3	6.4	1.2	3.4	3.3	<0.7	3.7	1	2.1	35.4	<0.7	13.2	5.7
SBC-1	3.5	16.1	225	113	22.7	86.1	26.1	194	25.9	2	24.5	147	182	30.5	134	15.3	2.1	<0.7	<0.7	3.4	1	8.1	771	49.3	106	12.3	47.6	9	1.8	1.1	7.5	6.5	1.2	3.5	3.1	<0.7	3.8	1	1.9	35.3	<0.7	13	5.8
SBC-1	3.6	16.2	223	110	22.7	83.5	26.8	194	28.1	2.1	25.4	144	178	29.2	133	15	2.1	<0.7	<0.7	3.3	<0.7	8.2	770	48.5	106	12.1	47.2	8.4	1.8	1.1	7.4	6.4	1.3	3.4	3.3	<0.7	3.8	1	1.9	34.8	<0.7	13.1	5.7
SBC-1	3.5	16.9	227	114	22.8	85.8	26.2	195	27.6	2.3	25.6	149	184	29.6	135	15.5	2.2	<0.7	<0.7	3	0.7	8.6	770	49.1	107	12.3	45.8	8.8	1.9	1.1	7.4	6.6	1.2	3.5	3.1	<0.7	3.7	1.1	1.9	35.1	<0.7	13.3	5.7
SBC-1	3.6	14.5	227	114	23.4	86.9	27.3	196	28.6	2.1	25.3	146	178	30.1	137	15.1	2.3	<0.7	<0.7	3.4	<0.7	8.3	781	49	106	12.3	46.7	9	1.8	1.2	7.6	6.6	1.2	3.7	3.3	<0.7	3.9	1.1	1.9	35.4	<0.7	13.4	5.7
SBC-1	3.4	15	226	114	22.4	85.2	27	192	27.5	2	25.7	151	179	30	138	15.6	2.7	<0.7	<0.7	3.3	1	8.4	788	49.8	108	12.5	48	9.1	1.8	1.1	7.6	6.5	1.3	3.4	3.2	<0.7	3.7	1	2.1	35.3	<0.7	12.9	5.8
SBC-1	3.5	15.3	231	116	23.4	87	26.9	194	28.3	2.2	24.6	150	180	30.3	136	15.7	2.3	<0.7	<0.7	3.5	<0.7	8.3	791	50.1	108	12.2	47.5	8.7	1.8	1.2	7.7	6.5	1.2	3.6	3.5	<0.7	4	1	1.9	35.5	<0.7	13.6	5.8
SBC-1	2.9	15.3	231	115	23.5	85.4	27.2	199	28.6	2	25.9	153	181	29.3	135	15.5	2.4	<0.7	<0.7	3.2	0.8	8.4	797	49.4	108	12.5	48.2	9.6	1.9	1.1	7.4	6.5	1.3	3.6	3.3	<0.7	3.9	1	2.1	35.8	<0.7	13.5	5.8
Average	3.37333	15.2267	226.267	113.333	22.7933	85.36	26.4067	194.8	27.5067	2.04667	25	147.867	180.2	29.5733	134.6	15.3267	2.33333	0.933333		3.22667	0.85	8.29333	774.133	49.3333	106.667	12.28	47.22	8.96667	1.8	1.12667	7.53333	6.48667	1.24	3.53333	3.27333		3.82	1.01333	1.97333	35.36		13.2267	5.73333
St. dev	0.20166	0.98232	2.31352	1.58865	0.389994	1.16729	0.658425	3.07525	0.901163	0.124595	0.576938	2.66905	1.97122	0.626175	2.09762	0.21202	0.205866	0.404145		0.186956	0.135401	0.138701	11.4572	0.5287	0.9759	0.132017	0.58334	0.291956	0.0654654	0.0457738	0.117514	0.130201	0.0507093	0.0899735	0.116292		0.114642	0.0351866	0.0883715	0.284856		0.20166	0.0617213
Accepted	3.19	20	220	109	22.7	82.8	31.2	186.8	27		25.7	147	178	36.5	134.3	15.3	2.35		0.4	3.3	1.01	8.19	788	51	105	12.6	48	9.7	2	1.2	8.54	7	1.34	3.61	3.64	0.47	3.74	1.11	1.62	35	0.7	15.8	5.76
Sco-1	1.6	10.9	136	78	11.4	32.8	34.2	112	17.3	1.9	12.1	116	176	23.8	180	12.2	1.3	1.9	<0.7	3.4	2.4	8.1	590	29.9	58.5	7	27.5	4.6	1.2	<0.7	4.7	4.1	0.8	2.5	2.4	<0.7	4.9	0.8	2	31.9	<0.7	9.5	3.2
Sco-1	1.7	11.3	139	77.1	11.7	33	33.7	110	17.9	1.8	13	117	173	22.8	179	11.7	1.7	1	<0.7	3.2	2.1	7.9	581	30.1	58.4	7	27	4.9	1.2	<0.7	4.6	4	0.9	2.5	2.2	<0.7	4.8	0.8	2	32.4	<0.7	9.6	3.2
Sco-1	2	11.7	139	79.9	11.8	35.3	34	113	18.4	1.7	11.6	114	176	23.4	177	12.3	1.2	1	<0.7	3.6	2.7	8	582	30.3	58.5	7	26.6	5.1	1.1	<0.7	4.6	4.3	0.9	2.4	2.4	<0.7	4.8	0.8	1.9	31.5	<0.7	9.5	3.2
Sco-1	1.9	11.2	139	77.5	11.7	34.1	33.7	103	17.3	1.7	11.6	113	178	23.4	180	12	1.3	1.2	<0.7	3.5	2.5	7.9	585	30.4	58.8	7	27.1	4.8	1	0.7	4.6	4.3	0.9	2.6	2.3	<0.7	4.8	0.8	2.1	32	<0.7	9.5	3.2
Sco-1	2	11.4	138	78	11.3	33.3	32.9	108	17.7	1.9	12.3	113	175	23.4	177	11.8	1.1	1	<0.7	3.5	2.5	7.9	574	29.9	59.1	7.1	26.7	4.7	1.1	<0.7	4.5	4.1	0.8	2.3	2.4	<0.7	4.7	0.8	1.8	31.8	<0.7	9.6	3.1
Sco-1	1.9	11.3	136	76.5	11.3	33.9	33.1	106	16.9	1.8	11.7	113	173	22.5	174	11.6	1.4	0.7	<0.7	3.5	2	7.9	584	29.6	58.8	7	26.7	5.2	1.1	<0.7	4.4	4.2	0.8	2.3	2.3	<0.7	4.9	0.8	1.8	31	<0.7	9.4	3.1
Sco-1	2	11.1	135	77.1	11.4	31.5	33.8	108	18.2	1.7	11.8	111	172	23.4	175	11.3	1	0.8	<0.7	3.9	2.7	7.5	584	30.2	57.9	7	26	4.8	1.2	<0.7	4.5	4.2	0.8	2.4	2.4	<0.7	4.7	0.8	2.1	31.5	<0.7	9.5	3.1
Sco-1	2	11.4	137	76.9	11.7	34.5	33.1	107	16.5	1.7	11.7	110	175	23	175	11.7	1.3	0.8	<0.7	3	2.6	7.7	582	30.1	58.1	6.9	25.9	4.7	1.1	<0.7	4.4	4.1	0.8	2.4	2.4	<0.7	4.9	0.8	2	31.5	<0.7	9.3	3.2
Sco-1	1.9	11.2	138	77.2	11.5	33.9	32.8	110	17.9	1.7	12.1	114	176	23.2	175	11.7	1.5	0.7	<0.7	3.6	2.7	7.8	584	30	58.4	7	26.3	5.3	1.1	<0.7	4.5	4.1	0.9	2.5	2.3	<0.7	4.7	0.8	1.9	31.8	<0.7	9.4	3.1
Sco-1	2.1	11.2	138	77.9	11.8	34.1	32.6	105	17.2	1.7	12.5	112	174	23.3	177	11.1	1.2	0.8	<0.7	3.5	2.6	7.9	584	30.3	59	7.2	27.5	5.2	1.1	0.7	4.5	4.1	0.8	2.4	2.2	<0.7	5.1	0.8	1.9	31.7	<0.7	9.1	3.1
Sco-1	2.2	11.6	139	77.6	11.6	36.2	34.5	110	17.3	1.9	11.6	111	175	23.4	177	11.6	1.2	0.7	<0.7	3.4	2.2	7.6	583	30.2	57.9	7	27.8	4.9	1.1	0.7	4.5	4.2	0.8	2.5	2.4	<0.7	4.8	0.8	2	31.1	<0.7	9.5	3.2
Sco-1	1.9	11.6	138	77.7	11.4	34.4	34.5	107	18.4	1.8	12.8	114	178	23.4	178	11.7	1.3	<0.7	<0.7	3.2	2.4	7.8	592	30.1	59.1	7.1	26.9	4.7	1.2	0.7	4.5	4.3	0.8	2.4	2.4	<0.7	5	0.8	1.9	31.8	<0.7	9.6	3.2
Sco-1	2.3	11.7	138	76.8	11.7	35.8	33.8	112	17.7	1.8	13	114	177	23.8	179	11.7	1.5	<0.7	<0.7	3.7	2.4	8.2	594	30.8	58.1	7.1	27.1	5.2	1.1	<0.7	4.4	4.4	0.9	2.3	2.3	<0.7	4.8	0.8	2	32.1	<0.7	9.6	3.1
Sco-1	2.3	11.7	140	80.5	11.8	34.7	33.6	110	18.8	1.6	12.2	116	175	24.2	180	11.6	1.1	0.7	<0.7	3.1	2.4	7.9	606	30.7	59.4	7	26.8	5	1.2	0.7	4.4	4.2	0.9	2.5	2.3	<0.7	4.7	0.8	1.9	31.4	<0.7	9.5	3.2
Sco-1	2.1	11.8	139	78.6	11.8	33.8	34.8	106	18	1.8	11.9	116	173	22.8	181	12.1	1.5	<0.7	<0.7	3.5	2.1	7.7	606	30	59.3	7.1	27.3	5.1	1.2	<0.7	4.6	4	0.9	2.5	2.4	<0.7	4.9	0.8	2	32.3	<0.7	9.5	3.2
Average	1.99333	11.4067	137.933	77.82	11.5933	34.0867	33.6733	108.467	17.7	1.76667	12.1267	113.6	175.067	23.32	177.6	11.74	1.30667	0.941667		3.44	2.42	7.85333	587.4	30.1733	58.62	7.03333	26.88	4.94667	1.13333	0.7	4.51333	4.17333	0.846667	2.43333	2.34		4.83333	0.8	1.95333	31.72		9.47333	3.16
St. dev	0.194447	0.265832	1.38701	1.11496	0.190738	1.18976	0.667048	2.85023	0.622208	0.0899735	0.500666	2.06328	1.83095	0.431277	2.1974	0.315776	0.186956	0.34234		0.235433	0.230527	0.180739	8.91868	0.305817	0.495984	0.0723747	0.542744	0.226358	0.0617213	0	0.0915475	0.116292	0.0516398	0.0899735	0.0736788		0.117514	1.14919e-16	0.0915475	0.398569		0.133452	0.0507093
Accepted	1.84	11	131	68	11	27	29	103	15	1	12	111	172	26	160	11	1.4	0.134	0.14	3.7	2.5	7.8	570		62	6.6	26	5.3	1.19	0.7	4.6	4.2	0.97	2.5	2.27	0.34	4.6	0.92	1.4	31	0.37	9.7	3
Table S2D. Rock-Eval standard values
Sample	S1	S2	S3	CO	Tmax	Tpeak	TOC	RC	MINC
GA-15A	0.07	12.95	1.8	0.7	422	462	4.22	3.06	1.14
GA-15B	0.06	12.84	1.79	0.68	422	462	4.22	3.07	1.16
GA-15C	0.07	13.02	1.8	0.68	422	462	4.23	3.07	1.17
GA-15D	0.07	12.93	1.81	0.68	423	463	4.25	3.09	1.16
GA-15E	0.07	12.9	1.79	0.71	424	464	4.25	3.09	1.16
GA-15F	0.07	13.13	1.81	0.68	422	462	4.24	3.07	1.16
GA-15G	0.07	13.3	1.82	0.67	422	462	4.25	3.06	1.17
GA-15H	0.07	13.11	1.8	0.68	423	463	4.23	3.06	1.17
GA-15I	0.07	12.72	1.81	0.67	422	462	4.24	3.1	1.17
GA-15J	0.07	13.32	1.82	0.68	422	462	4.26	3.07	1.18
Average	0.07	13.02	1.81	0.68	422.4	462.4	4.24	3.07	1.16
St. dev	0	0.19	0.01	0.01	0.7	0.7	0.01	0.01	0.01
Accepted							4.23

## Sheet: Table S3
Table S3. XRD results for Velkerri Formation
Sample No.	Sample ID.	Strat. Height (m)	Member	Quartz	Kaolinite	Illite	Glauconite	K-Feldspar	Montmorillonite	Pyrite	Magnetite	Siderite	Dolomite	Plagioclase	Total carbonate	Totals	Fit
2293040	20150102	394.1	Upper	33.31	19	28.83	1.59	14.86	1.44	0.13	0.25	0.17	0.42	0	0.59	100	9.645
2293041	20150103	396.475	Upper	28.98	19.41	33.09	2	14.22	1.64	0.03	0.22	0.18	0.23	0	0.41	100	9.14
2293042	20150104	401.195	Upper	28.18	19.57	34.32	1.05	13.79	1.84	0.5	0.24	0.23	0.28	0	0.51	100	8.225
2293043	20150105	405.895	Upper	36.21	15.37	28.64	0.85	16.69	1.09	0.44	0.21	0.3	0.22	0	0.52	100.02	8.064
2293044	20150106	410.545	Upper	21.55	15.46	22.8	0.57	3.89	1.22	0.44	0.15	33.91	0	0	33.91	99.99	2.807
2293045	20150107	415.15	Upper	26.13	21.25	34.05	0.82	13.33	1.79	0.28	0.36	1.76	0.25	0	2.01	100.02	6.061
2293046	20150108	419.855	Upper	23.51	21.88	37.25	2.04	11.82	1.58	0.95	0.3	0.23	0.43	0	0.66	99.99	7.185
2293047	20150109	424.61	Upper	26.22	19.63	35.2	1.27	11.39	1.82	0.67	0.45	3.06	0.3	0	3.36	100.01	4.985
2293048	20150110	429.265	Upper	24.81	20.51	36.57	1.15	13.59	1.87	0.4	0.32	0.41	0.36	0	0.77	99.99	7.058
2293049	20150111	433.875	Upper	29.37	20.94	31.97	0.88	13.05	1.45	1.49	0.25	0.33	0.28	0	0.61	100.01	5.749
2293050	20150112	438.53	Upper	23.58	21.87	34.24	0.64	9.46	1.64	0.46	0.44	7.42	0.24	0	7.66	99.99	4.823
2293051	20150113	443.265	Upper	24.82	21.77	37.23	1.51	11.21	1.5	0.77	0.42	0.4	0.37	0	0.77	100	5.658
2293052	20150114	447.95	Upper	28.04	19.8	34.67	0.86	13.13	1.62	0.94	0.33	0.24	0.36	0	0.6	99.99	6.303
2293053	20150115	452.635	Upper	19.28	25.16	39.72	0.81	9.23	2.13	0.42	0.49	2.5	0.26	0	2.76	100	5.869
2293054	20150116	457.055	Upper	28.8	19.02	34.43	0.82	13.56	1.88	1.03	0.05	0.02	0.38	0	0.4	99.99	6.68
2293055	20150117	468.995	Upper	25.93	21.25	36.21	0.9	11.96	1.77	1.13	0	0.57	0.29	0	0.86	100.01	5.646
2293056	20150118	471.235	Upper	44.84	15.42	21.96	0.35	15.44	0.62	0.22	0	0.95	0.2	0	1.15	100	7.239
2293057	20150119	475.905	Upper	38.6	15.48	28.26	1.17	14.02	0.93	0.93	0.08	0.23	0.31	0	0.54	100.01	7.554
2293058	20150120	480.645	Upper	23.59	15.23	13.95	0.79	3.03	0.34	0.61	0.13	42.33	0	0	42.33	100	2.844
2293059	20150121	485.445	Upper	30.9	19.51	31.58	1.1	13.99	1.36	0.96	0.11	0.22	0.26	0	0.48	99.99	6.037
2293060	20150122	490.135	Upper	25.37	15.9	40.61	3.93	10.12	1.74	1.64	0.29	0.16	0.25	0	0.41	100.01	7.043
2293061	20150123	494.765	Upper	31.35	20.44	30.63	1.19	13.36	1.53	0.84	0.17	0.23	0.27	0	0.5	100.01	6.892
2293062	20150124	499.485	Upper	20.33	23.5	41.66	1.42	9.12	2.14	0.99	0.31	0.26	0.28	0	0.54	100.01	6.525
2293063	20150125	504.345	Upper	21.37	21.44	40.78	1.8	10.63	2.41	0.71	0.31	0.18	0.37	0	0.55	100	7.276
2293064	20150126	509.16	Upper	22.17	21.07	40.49	1.65	9.82	2.17	0.59	0.32	1.38	0.34	0	1.72	100	6.283
2293065	20150127	518.05	Upper	26.06	21.41	36.67	1.1	11.77	1.62	0.69	0.22	0.2	0.27	0	0.47	100.01	6.465
2293066	20150128	522.745	Upper	23.67	17.14	43.28	2.35	10.01	2.01	0.74	0.378	0.05	0.37	0	0.42	99.998	6.763
2293067	20150129	527.37	Upper	27.22	21.1	35.29	1.89	11.04	1.51	1.4	0.1	0.16	0.3	0	0.46	100.01	6.856
2293068	20150130	532.01	Upper	22.31	23.86	38.76	1.03	9.94	1.92	0.87	0.22	0.78	0.31	0	1.09	100	5.934
2293069	20150131	536.75	Upper	23.73	20.7	39.86	2	9.75	2.07	1.14	0.24	0.2	0.32	0	0.52	100.01	6.463
2293070	20150132	541.46	Upper	24.05	21.78	37.47	2.36	10.4	1.73	1.55	0.17	0.17	0.33	0	0.5	100.01	6.844
2293071	20150133	545.975	Upper	23.54	23.37	37.26	1.12	10.12	1.8	2.17	0.12	0.27	0.23	0	0.5	100	5.7
2293072	20150134	550.715	Upper	22.95	22.41	39.26	2.01	9.41	1.81	1.09	0.18	0.59	0.29	0	0.88	100	5.86
2293073	20150135	555.24	Upper	24.49	21.93	37.31	0.98	8.45	1.89	0.82	0.43	3.47	0.25	0	3.72	100.02	4.987
2293074	20150136	559.985	Upper	23.83	22.58	38.96	1.02	9.73	1.84	1.12	0.24	0.37	0.31	0	0.68	100	5.578
2293075	20150137	564.75	Upper	23.45	20.6	42.25	3.61	6.82	2.03	0.5	0.36	0.1	0.29	0	0.39	100.01	8.018
2293076	20150138	569.505	Upper	27.7	19.66	36.97	0.77	10.81	1.64	0.4	0.22	1.63	0.2	0	1.83	100	6.335
2293077	20150139	574.4	Upper	22.67	21.5	41.53	0.92	8.57	1.84	1.02	0.35	1.42	0.18	0	1.6	100	5.248
2293078	20150140	579.02	Upper	21.73	21.9	40.24	1.19	6.43	2.17	0.3	0.47	5.4	0.18	0	5.58	100.01	5.246
2293079	20150141	583.485	Upper	23.65	18.81	43.07	1.1	8.63	2.16	0.49	0.34	1.5	0.25	0	1.75	100	5.554
2293080	20150142	588.245	Upper	23.04	17.14	44.46	2.47	8.53	2.31	1.14	0.37	0.12	0.44	0	0.56	100.02	7.025
2293081	20150143	593.09	Upper	23.04	20.81	38.5	0.82	5.82	1.95	1.34	0.39	7.19	0.13	0	7.32	99.99	4.394
2293082	20150144	597.905	Upper	24.02	20.9	40.43	2.56	8.08	2.02	1.13	0.25	0.19	0.43	0	0.62	100.01	7.603
2293083	20150145	602.765	Upper	23.46	20.2	40.87	0.87	6.91	1.9	0.42	0.53	4.65	0.19	0	4.84	100	5.476
2293084	20150146	607.595	Upper	26.38	20.33	38.26	0.83	9.38	1.87	1.23	0.2	1.31	0.21	0	1.52	100	5.572
2293085	20150147	612.34	Upper	23.7	20.45	36.74	0.79	5.89	1.87	0.33	0	10.1	0.13	0	10.23	100	5.283
2293086	20150148	617.12	Upper	23.75	20.41	39.1	1.41	9.55	1.79	2.49	0.04	0.7	0.77	0	1.47	100.01	5.44
2293087	20150149	621.84	Upper	37.02	6.73	35.66	2.3	11.61	1.88	1.95	0.16	0.26	0.59	1.83	0.85	99.99	6.987
2293088	20150150	626.555	Upper	35.16	5.04	38.9	2.49	12.43	2.11	1.07	0.14	0.2	0.93	1.55	1.13	100.02	7.841
2293089	20150151	631.295	Upper	26.41	16.47	39.3	2.51	10.27	1.96	1.54	0.16	0.31	1.07	0	1.38	100	6.765
2293090	20150152	636.115	Upper	23.36	13.85	36.47	1.53	9.96	1.68	2.22	0.09	0.26	10.58	0	10.84	100	5.653
2293091	20150153	640.98	Upper	30.59	11.63	37.21	2.83	11.52	2	1.56	0.19	0.26	1.17	1.03	1.43	99.99	7.086
2293092	20150154	645.75	Upper	34.72	6.75	36.26	2.8	12.63	1.89	1.82	0.22	0.14	1.01	1.75	1.15	99.99	7.288
2293093	20150155	650.495	Upper	38.67	3.3	35.21	1.76	14.38	1.84	1.25	0.06	0.14	0.58	2.8	0.72	99.99	8.116
2293094	20150156	655.27	Upper	35.11	2.11	38.27	3.42	13.62	1.9	1.42	0.21	0.11	1.39	2.43	1.5	99.99	7.558
2293095	20150157	661.975	Upper	39.3	2.37	34.36	2	14.4	2.09	1.16	0.04	0	0.47	3.81	0.47	100	8.715
2293096	20150158	664.685	Upper	32.85	2.02	27.37	1.25	10.14	1.29	2.8	0.03	0	21.49	0.75	21.49	99.99	6.207
2293097	20150159	669.51	Upper	38.05	1.97	27.22	1.45	11.94	1.33	3.02	0.02	0	13.14	1.86	13.14	100	6.698
2293098	20150160	674.32	Middle	39.47	1.74	33.61	2	14.53	2.07	1.61	0.05	0	0.27	4.64	0.27	99.99	8.385
2293099	20150161	679.11	Middle	45.5	2.31	28.96	1.65	14.31	1.5	1.36	0.02	0.05	0.34	3.99	0.39	99.99	9.225
2293100	20150162	688.61	Middle	40.4	2.44	30.41	1.83	13.21	1.75	3.66	0.07	0.11	0.25	5.86	0.36	99.99	7.038
2293101	20150163	697.9	Middle	45.02	2.07	27.59	1.53	13.4	1.49	4.11	0	0	0.21	4.57	0.21	99.99	7.407
2293102	20150164	707.305	Middle	40.49	3.82	31.49	2.57	10.84	2.03	3.19	0.11	0.13	0.36	4.96	0.49	99.99	7.117
2293103	20150165	722.045	Middle	38.21	4.58	34.1	2.41	9.57	2.12	2.83	0.07	0.18	0.4	5.53	0.58	100	6.907
2293104	20150166	731.535	Middle	29.87	13.26	38.13	1.52	8.41	2.61	0.77	0	0.2	0.51	4.71	0.71	99.99	8.013
2293105	20150167	736.33	Middle	32.17	6.44	37.78	3.1	5.93	1.92	4.26	0.24	0.41	0.49	7.27	0.9	100.01	5.478
2293106	20150168	746.02	Middle	31.3	3.9	42.23	2.78	8.18	2.65	1.97	0.21	0.19	0.61	5.97	0.8	99.99	6.526
2293107	20150169	750.275	Middle	32.39	15.31	34.89	1.42	6.95	2.36	1.16	0	1.21	0.41	3.89	1.62	99.99	5.693
2293108	20150170	754.96	Middle	31.33	12.56	38.92	1.51	8.93	2.6	0.3	0.05	0.22	0.47	3.12	0.69	100.01	7.513
2293109	20150171	760.325	Middle	30.54	8.22	40.18	2.61	7.03	2.54	2.01	0.15	0.24	0.55	5.92	0.79	99.99	6.295
2293110	20150172	765.29	Middle	30.678	9.06	40.02	2.16	6.69	2.26	1.92	0.14	0.22	0.47	6.38	0.69	99.998	6.117
2293111	20150173	769.64	Middle	32.36	7.4	38.44	2.81	7.07	2.38	2.49	0.22	0.1	0.55	6.18	0.65	100	6.196
2293112	20150174	783.81	Middle	30.66	9.33	38.14	2.1	7.96	2.95	1.92	0.15	0.2	0.49	6.12	0.69	100.02	6.966
2293113	20150175	793.365	Middle	35.2	3.38	36.63	2.72	8.77	2.87	2.77	0.12	0.28	0.53	6.73	0.81	100	7.357
2293114	20150176	802.74	Middle	47.65	2.05	26.12	1.72	12.67	2.04	1.46	0.05	0.13	0.45	5.66	0.58	100	9.359
2293115	20150177	812.11	Middle	46.1	2.83	27.88	1.34	12.78	2.44	1.15	0.04	0.09	0.49	4.87	0.58	100.01	10.107
2293116	20150178	821.78	Middle	46.42	2.24	28.25	1.38	12.95	1.87	0.93	0.03	0.08	0.49	5.37	0.57	100.01	10.282
2293117	20150179	831.205	Middle	43.75	2.18	25.98	1.49	11.81	2.04	0.81	0.07	0.02	8.47	3.38	8.49	100	9.447
2293118	20150180	845.475	Middle	56.83	3.04	20.19	1.27	12.5	1.18	0.73	0.05	0.02	0.38	3.79	0.4	99.98	10.688
2293119	20150181	854.93	Middle	52.07	2.78	23.63	1.48	12.27	1.28	1.01	0	0.02	0.36	5.11	0.38	100.01	9.537
2293120	20150182	864.5	Middle	45.38	3.79	28.26	1.43	12.11	1.72	0.84	0	0.03	0.49	5.95	0.52	100	9.417
2293121	20150183	873.765	Middle	41.28	4.36	31.82	1.49	11.36	1.83	0.69	0	0.02	0.54	6.6	0.56	99.99	8.681
2293122	20150184	883.625	Middle	41.88	2.51	31.89	1.6	11.75	1.87	1.09	0	0.02	0.46	6.93	0.48	100	8.534
2293123	20150185	898.25	Middle	40.63	1.62	19.31	1.22	10.72	1.2	0.7	0.45	0.02	20.03	4.1	20.05	100	9.959
2293124	20150186	912.365	Middle	55.01	6.5	17.45	1.24	12.63	0.78	1.63	0.33	0.01	0.81	3.6	0.82	99.99	8.216
2293125	20150187	922.045	Middle	42.6	5.79	29.55	1.35	11.66	1.33	2.23	0.28	0.01	0.6	4.61	0.61	100.01	6.827
2293126	20150188	926.59	Middle	42.08	2.68	30.08	2.66	12.92	1.2	2.11	0.17	0.02	0.49	5.6	0.51	100.01	6.637
2293127	20150189	931.525	Middle	43.86	3.32	27.7	1.56	12.73	1.23	2.59	0.21	0.02	0.47	6.32	0.49	100.01	7.1115
2293128	20150190	940.685	Middle	43.28	6.99	27.03	1.36	11.32	1.16	1.49	0.33	0.01	0.53	6.5	0.54	100	6.659
2293129	20150191	950.64	Lower	37.59	6.49	34.95	1.34	11.5	2.5	0.18	0.24	0.05	0.49	4.67	0.54	100	8.627
2293130	20150192	957.65	Lower	37.46	12.25	33.7	0.93	9.74	2.17	0.12	0.38	0.05	0.34	2.86	0.39	100	7.062
2293131	20150193	983.375	Lower	36.45	8.3	32.59	1.14	11.18	2.49	0.18	0.31	0.12	0.45	6.8	0.57	100.01	8.442
2293132	20150194	1002.46	Lower	30.29	10.7	34.19	1.08	9.86	2.64	0.15	0.36	0.19	0.58	9.97	0.77	100.01	7.702
2293133	20150195	1019.75	Lower	19.85	13.53	32.36	0.92	7.95	2.77	0.16	0.44	0.27	1.73	20.02	2	100	7.18
2293138	20150200	1040.86	Lower	43.61	6.79	27.66	1.39	10.79	1.16	1.49	0.12	0.17	0.3	6.51	0.47	99.99	8.025
2293142	20150204	1055.15	Lower	26.95	15.96	38.27	1.16	8.28	2.86	0.16	0.69	0.09	0.47	5.1	0.56	99.99	6.652
2293134	20150196	1088.21	Lower	41.34	11.27	26.23	1.08	11.31	1.68	0.15	0.38	0.18	0.6	5.78	0.78	100	7.371
2293139	20150201	1117.47	Lower	37.45	6.53	35.16	1.35	11.24	2.48	0.2	0.24	0.05	0.44	4.87	0.49	100.01	7.126
2293135	20150197	1122.4	Lower	31.97	8.13	37.27	1.4	9.33	2.14	1.02	0.31	0.14	3.01	5.28	3.15	100	6.755
2293140	20150202	1127.1	Lower	26.4	9.26	46.33	1.63	8.22	2.17	0.62	0.41	0.07	0.4	4.49	0.47	100	8.655
2293136	20150198	1131.74	Lower	21.78	10.86	48.13	1.68	7.2	2.63	0.14	0.34	0.03	1.09	6.12	1.12	100	6.304
2293137	20150199	1141.41	Lower	43.92	3.4	28.48	1.52	11.51	1.2	2.54	0.08	0.12	1.26	5.97	1.38	100	9.698
2293141	20150203	1150.62	Lower	28.62	18.51	32.29	1.91	16.45	1.37	0.32	0.14	0.15	0.16	0.08	0.31	100	6.71
2293143	20150205	1155.43	Lower	17.05	14.67	51.42	1.72	6.19	2.74	0.19	0.57	0.08	0.47	4.92	0.55	100.02	6.703
2293144	20150206	1164.9	Lower	28.49	13.8	38.65	1.4	6.93	2.08	0.22	0.43	0.03	0.36	7.59	0.39	99.98	6.789
2293145	20150207	1174.62	Lower	23.28	17.8	41.12	1.48	6.93	2.57	0.26	0.74	0.11	0.4	5.31	0.51	100	6.979
2293146	20150208	1193.67	Lower	22.4	16.17	44.86	1.35	6.71	2.19	0.24	0.44	0.03	0.47	5.15	0.5	100.01	6.729
2293147	20150209	1203.28	Lower	28.35	6.57	45.03	1.69	10.18	2.55	0.19	0.23	0.06	0.51	4.63	0.57	99.99	7.398
2293148	20150210	1208.1	Lower	33.21	8.95	40.16	1.43	10.45	1.74	0.3	0.4	0.06	0.69	2.61	0.75	100	7.553
2293149	20150211	1220.65	Lower	33.56	13.99	39.36	1.04	7.32	1.66	0.26	0.42	0.1	0.43	1.86	0.53	100	6.939

## Sheet: Table S4
Strat. Height (m)	Member	S1	S2	S3	Tmax	HI*	OI*	TOC*	TPI	Estimated R0	Palaeo T Estimate 1	Palaeo T Median	Palaeo T Estimate 2
394.1	Upper	0	0.25	0.09	427	75	27	0.33	0.02	0.526	69.0532	90.573	112.093
396.475	Upper	0.01	0.26	0.12	426	69	31	0.38	0.05	0.508	67.7047	89.5825	111.46
401.195	Upper	0.01	0.36	0.14	430	98	37	0.36	0.01	0.58	73.0153	93.5031	113.991
405.895	Upper	0.01	0.29	0.23	431	95	76	0.3	0.02	0.598	74.3092	94.4664	114.624
410.545	Upper	0	0.27	2.97	438	39	437	0.68	0.02	0.724	83.0173	101.035	119.053
411.6	Upper	0.0294985	0.4	0.99	430	87.7193	217.105	0.456	0.0686813	0.58	73.0153	93.5031	113.991
411.6	Upper	0.0294985	0.4	0.99	430	87.7193	217.105	0.456	0.07	0.58	73.0153	93.5031	113.991
415.15	Upper	0.01	0.52	0.37	434	128	91	0.4	0.02	0.652	78.1141	97.3179	116.522
419.855	Upper	0.01	0.26	0.13	427	58	29	0.45	0.04	0.526	69.0532	90.573	112.093
424.61	Upper	0.01	0.21	0.45	428	63	133	0.34	0.04	0.544	70.3876	91.5566	112.726
429.265	Upper	0.01	0.42	0.23	428	97	53	0.43	0.03	0.544	70.3876	91.5566	112.726
430.2	Upper	0.0578035	0.43	0.17	429	91.8803	36.3248	0.468	0.118497	0.562	71.7082	92.5332	113.358
430.2	Upper	0.0578035	0.43	0.17	429	91.8803	36.3248	0.468	0.12	0.562	71.7082	92.5332	113.358
433.875	Upper	0.05	0.44	0.28	430	99	61	0.45	0.09	0.58	73.0153	93.5031	113.991
438.53	Upper	0.02	0.74	0.83	432	155	175	0.48	0.02	0.616	75.5901	95.4232	115.256
443.265	Upper	0.02	0.36	0.27	426	75	56	0.48	0.06	0.508	67.7047	89.5825	111.46
447.95	Upper	0.03	0.38	0.22	430	94	54	0.41	0.06	0.58	73.0153	93.5031	113.991
452.635	Upper	0.07	1.45	0.58	431	214	86	0.68	0.05	0.598	74.3092	94.4664	114.624
457.055	Upper	0.02	0.32	0.17	430	83	45	0.38	0.06	0.58	73.0153	93.5031	113.991
459.85	Upper	0.0682927	0.39	0.59	428	107.438	162.534	0.363	0.149015	0.544	70.3876	91.5566	112.726
459.85	Upper	0.0682927	0.39	0.59	428	107.438	162.534	0.363	0.15	0.544	70.3876	91.5566	112.726
468.995	Upper	0.34	1.1	0.26	430	158	37	0.7	0.23	0.58	73.0153	93.5031	113.991
471.235	Upper	1.41	4.3	0.22	408	381	20	1.13	0.25	0.184	40.6299	70.3508	100.072
475.905	Upper	0.88	1.29	0.2	410	151	24	0.85	0.41	0.22	43.9373	72.6372	101.337
480.645	Upper	0	0.2	2.38	436	52	610	0.39	0.02	0.688	80.5892	99.1882	117.787
485.445	Upper	0.07	0.37	0.26	428	78	54	0.48	0.16	0.544	70.3876	91.5566	112.726
490.135	Upper	0.02	0.21	0.16	427	45	35	0.46	0.1	0.526	69.0532	90.573	112.093
494.765	Upper	0.23	0.66	0.14	425	114	24	0.58	0.26	0.49	66.3419	88.5847	110.828
497.5	Upper	0.17	0.61	0.33	425	103.39	55.9322	0.59	0.217949	0.49	66.3419	88.5847	110.828
499.485	Upper	0.04	0.34	0.18	426	70	37	0.49	0.11	0.508	67.7047	89.5825	111.46
504.345	Upper	0.02	0.25	0.13	424	62	33	0.4	0.08	0.472	64.9644	87.5796	110.195
509.16	Upper	0.05	0.44	0.44	421	79	79	0.56	0.11	0.418	60.7406	84.5186	108.297
518.05	Upper	0.05	0.4	0.17	422	86	37	0.46	0.11	0.436	62.1641	85.5467	108.929
522.745	Upper	0.04	0.37	0.12	425	66	22	0.56	0.11	0.49	66.3419	88.5847	110.828
527.37	Upper	0.19	0.48	0.14	426	79	23	0.61	0.28	0.508	67.7047	89.5825	111.46
532.01	Upper	0.06	0.65	0.38	433	125	72	0.52	0.09	0.634	76.8583	96.3737	115.889
536.75	Upper	0.07	0.41	0.18	424	65	29	0.64	0.15	0.472	64.9644	87.5796	110.195
541.46	Upper	0.06	0.47	0.15	427	74	23	0.64	0.12	0.526	69.0532	90.573	112.093
545.975	Upper	0.13	0.89	0.25	433	117	33	0.76	0.13	0.634	76.8583	96.3737	115.889
550.715	Upper	0.05	0.34	0.33	423	64	62	0.53	0.12	0.454	63.5719	86.567	109.562
555.24	Upper	0.06	0.88	0.78	436	142	126	0.62	0.06	0.688	80.5892	99.1882	117.787
559.985	Upper	0.06	0.54	0.44	433	93	76	0.58	0.1	0.634	76.8583	96.3737	115.889
564.75	Upper	0.03	0.49	0.26	427	57	30	0.86	0.06	0.526	69.0532	90.573	112.093
569.505	Upper	0.06	1.02	0.5	431	178	87	0.58	0.06	0.598	74.3092	94.4664	114.624
574.4	Upper	0.1	1.02	0.63	434	140	87	0.73	0.09	0.652	78.1141	97.3179	116.522
579.02	Upper	0.09	0.74	0.68	427	116	107	0.64	0.11	0.526	69.0532	90.573	112.093
583.485	Upper	0.07	0.54	0.55	433	97	97	0.56	0.11	0.634	76.8583	96.3737	115.889
588.245	Upper	0.1	0.56	0.17	424	74	23	0.75	0.15	0.472	64.9644	87.5796	110.195
593.09	Upper	0.09	0.72	0.69	436	121	116	0.59	0.11	0.688	80.5892	99.1882	117.787
597.905	Upper	0.05	0.34	0.12	426	58	20	0.59	0.13	0.508	67.7047	89.5825	111.46
602.765	Upper	0.09	0.78	0.63	433	144	116	0.54	0.1	0.634	76.8583	96.3737	115.889
607.595	Upper	0.21	1.23	0.54	434	161	71	0.77	0.15	0.652	78.1141	97.3179	116.522
610	Upper	0.27	1.12	0.48	429	186.667	80	0.6	0.194245	0.562	71.7082	92.5332	113.358
612.34	Upper	0.11	0.78	0.74	434	140	134	0.55	0.12	0.652	78.1141	97.3179	116.522
617.12	Upper	0.18	0.58	0.24	427	86	36	0.67	0.23	0.526	69.0532	90.573	112.093
621.84	Upper	1.45	10.26	0.24	428	290	7	3.54	0.12	0.544	70.3876	91.5566	112.726
626.555	Upper	1.21	4.12	0.24	427	195	11	2.11	0.23	0.526	69.0532	90.573	112.093
631.295	Upper	0.35	1.36	0.16	428	109	13	1.24	0.2	0.544	70.3876	91.5566	112.726
636.115	Upper	0.69	2.83	0.29	430	181	19	1.56	0.2	0.58	73.0153	93.5031	113.991
640.98	Upper	0.66	4.75	0.31	428	185	12	2.57	0.12	0.544	70.3876	91.5566	112.726
645.75	Upper	0.89	4.64	0.27	427	184	11	2.52	0.16	0.526	69.0532	90.573	112.093
650.495	Upper	2.43	9.6	0.22	433	313	7	3.07	0.2	0.634	76.8583	96.3737	115.889
655.27	Upper	0.71	3.33	0.35	426	142	15	2.34	0.18	0.508	67.7047	89.5825	111.46
661.975	Upper	2.5	15.44	0.22	433	348	5	4.44	0.14	0.634	76.8583	96.3737	115.889
664.685	Upper	1.67	8.43	0.39	428	319	15	2.64	0.17	0.544	70.3876	91.5566	112.726
669.51	Upper	1.92	15.29	0.35	430	370	9	4.13	0.11	0.58	73.0153	93.5031	113.991
674.32	Middle	2.54	18.02	0.21	431	344	4	5.24	0.12	0.598	74.3092	94.4664	114.624
679.11	Middle	1.99	12.83	0.23	432	370	7	3.47	0.13	0.616	75.5901	95.4232	115.256
682.07	Middle	3.64942	28.51	0.57	431	480.614	9.6089	5.932	0.113479	0.598	74.3092	94.4664	114.624
682.07	Middle	3.64942	28.51	0.57	431	480.614	9.6089	5.932	0.11	0.598	74.3092	94.4664	114.624
688.61	Middle	3.03	27.16	0.18	433	365	2	7.43	0.1	0.634	76.8583	96.3737	115.889
695.35	Middle	3.85	22.58	0.51	431	335.513	7.57801	6.73	0.145668	0.598	74.3092	94.4664	114.624
697.9	Middle	2.42	20.62	0.29	434	341	5	6.05	0.11	0.652	78.1141	97.3179	116.522
700.45	Middle	4.31	28.5	0.52	435	365.385	6.66667	7.8	0.131362	0.67	79.3576	98.2561	117.155
707.305	Middle	2.01	20.96	0.25	430	306	4	6.85	0.09	0.58	73.0153	93.5031	113.991
722.045	Middle	1.9	17.34	0.24	429	280	4	6.18	0.1	0.562	71.7082	92.5332	113.358
731.535	Middle	1.84	5.74	0.14	429	314	8	1.83	0.24	0.562	71.7082	92.5332	113.358
736.33	Middle	2.28	21.35	0.32	433	265	4	8.07	0.1	0.634	76.8583	96.3737	115.889
746.02	Middle	1.3	9.67	0.28	427	191	6	5.07	0.12	0.526	69.0532	90.573	112.093
746.5	Middle	2.1371	16.31	0.52	431	279.952	8.92551	5.826	0.11585	0.598	74.3092	94.4664	114.624
746.5	Middle	2.1371	16.31	0.52	431	279.952	8.92551	5.826	0.12	0.598	74.3092	94.4664	114.624
750.275	Middle	0.58	1.17	0.31	435	138	36	0.84	0.33	0.67	79.3576	98.2561	117.155
754.96	Middle	0.29	0.52	0.15	435	107	31	0.48	0.36	0.67	79.3576	98.2561	117.155
760.325	Middle	1.61	10.01	0.32	430	192	6	5.2	0.14	0.58	73.0153	93.5031	113.991
765.29	Middle	1.64	8.86	0.26	428	180	5	4.93	0.16	0.544	70.3876	91.5566	112.726
769.64	Middle	1.77	9.57	0.27	429	169	5	5.67	0.16	0.562	71.7082	92.5332	113.358
783.81	Middle	1.91	12.13	0.21	430	204	4	5.93	0.14	0.58	73.0153	93.5031	113.991
793.365	Middle	2.17	15.68	0.32	432	206	4	7.63	0.12	0.616	75.5901	95.4232	115.256
802.74	Middle	2.44	16.43	0.27	432	263	4	6.24	0.13	0.616	75.5901	95.4232	115.256
812.11	Middle	2.33	17.52	0.25	437	295	4	5.95	0.12	0.706	81.809	100.114	118.42
814.4	Middle	4.29	23.56	0.61	439	298	8	7.9	0.15	0.742	84.2143	101.95	119.685
820.7	Middle	3.61	18.35	0.7	437	285	11	6.44	0.16	0.706	81.809	100.114	118.42
821.78	Middle	2.21	15.95	0.33	438	279	6	5.72	0.12	0.724	83.0173	101.035	119.053
824.2	Middle	3.57	19.66	0.79	433	290.828	11.6864	6.76	0.153681	0.634	76.8583	96.3737	115.889
831.205	Middle	2.08	10.06	0.34	436	264	9	3.81	0.17	0.688	80.5892	99.1882	117.787
831.63	Middle	2.82183	6.98	0.45	425	192.128	12.3865	3.633	0.287888	0.49	66.3419	88.5847	110.828
831.63	Middle	2.82183	6.98	0.45	425	192.128	12.3865	3.633	0.29	0.49	66.3419	88.5847	110.828
845.475	Middle	3.42	9.97	0.18	433	281	5	3.54	0.26	0.634	76.8583	96.3737	115.889
850	Middle	0.65	1.64	0.81	442	159	79	1.03	0.28	0.796	87.7395	104.661	121.583
850	Middle	2.22332	5.41	0.42	430	157.085	12.1951	3.444	0.291265	0.58	73.0153	93.5031	113.991
850	Middle	2.22332	5.41	0.42	430	157.085	12.1951	3.444	0.29	0.58	73.0153	93.5031	113.991
854.93	Middle	3.31	9.13	0.2	433	220	5	4.16	0.27	0.634	76.8583	96.3737	115.889
863.6	Middle	3.19	8.31	0.65	428	274	21	3.03	0.28	0.544	70.3876	91.5566	112.726
864.5	Middle	2.46	10.77	0.23	433	253	5	4.25	0.19	0.634	76.8583	96.3737	115.889
873.765	Middle	1.6	3.6	0.18	435	184	9	1.95	0.31	0.67	79.3576	98.2561	117.155
876.25	Middle	3.16	6.53	0.49	435	243.657	18.2836	2.68	0.326109	0.67	79.3576	98.2561	117.155
879.9	Middle	1.55	2.19	0.93	398	203	86	1.08	0.41	0.004	22.6738	58.2092	93.7446
879.9	Middle	3.12057	5.49	0.45	438	226.579	18.572	2.423	0.362411	0.724	83.0173	101.035	119.053
879.9	Middle	3.12057	5.49	0.45	438	226.579	18.572	2.423	0.36	0.724	83.0173	101.035	119.053
883.625	Middle	1.82	6	0.18	429	187	6	3.21	0.23	0.562	71.7082	92.5332	113.358
898.25	Middle	1.31	4.04	0.71	429	232	41	1.74	0.24	0.562	71.7082	92.5332	113.358
912.365	Middle	3.49	7.34	0.2	407	305	8	2.41	0.32	0.166	38.9436	69.1913	99.4389
918.77	Middle	0.395648	0.25	0.34	408	82.7815	112.583	0.302	0.612792	0.184	40.6299	70.3508	100.072
918.77	Middle	0.395648	0.25	0.34	408	82.7815	112.583	0.302	0.61	0.184	40.6299	70.3508	100.072
922.045	Middle	2.66	10.92	0.26	437	197	5	5.54	0.2	0.706	81.809	100.114	118.42
924.9	Middle	2.45	6.09	0.57	428	156.959	14.6907	3.88	0.286885	0.544	70.3876	91.5566	112.726
926.5	Middle	2.06967	5.48	0.73	435	162.226	21.6104	3.378	0.274141	0.67	79.3576	98.2561	117.155
926.5	Middle	2.06967	5.48	0.73	435	162.226	21.6104	3.378	0.27	0.67	79.3576	98.2561	117.155
926.59	Middle	1.4	3.8	0.29	422	95	7	4.02	0.27	0.436	62.1641	85.5467	108.929
931.525	Middle	2.55	11.28	0.29	434	193	5	5.86	0.18	0.652	78.1141	97.3179	116.522
935.6	Middle	3.13987	5.85	0.69	434	152.463	17.9828	3.837	0.349267	0.652	78.1141	97.3179	116.522
935.6	Middle	3.13987	5.85	0.69	434	152.463	17.9828	3.837	0.35	0.652	78.1141	97.3179	116.522
940.685	Middle	2.8	8.02	0.21	436	182	5	4.4	0.26	0.688	80.5892	99.1882	117.787
945.5	Middle	1.65281	2.73	0.48	425	77.5789	13.6402	3.519	0.377111	0.49	66.3419	88.5847	110.828
945.5	Middle	1.65281	2.73	0.48	425	77.5789	13.6402	3.519	0.38	0.49	66.3419	88.5847	110.828
950.64	Lower	0.01	0.08	0.07	456	65	57	0.12	0.09	1.048	103.016	116.728	130.441
957.65	Lower	0	0.07	0.06	442	101	89	0.07	0.02	0.796	87.7395	104.661	121.583
983.375	Lower	0	0.07	0.08	452	102	108	0.07	0.02	0.976	98.834	113.372	127.91
1002.46	Lower	0	0.11	0.05	454	108	51	0.1	0.02	1.012	100.942	115.059	129.176
1040.86	Lower	0	0.02	0.06	490	42	104	0.05	0.03	1.66	133.928	142.941	151.953
1055.15	Lower	1.18	3.53	0.25	451	93	7	3.8	0.25	0.958	97.7669	112.522	127.278
1088.21	Lower	0.01	0.14	0.07	447	92	47	0.15	0.1	0.886	93.407	109.077	124.747
1117.47	Lower	0.03	0.16	0.06	461	52	19	0.31	0.14	1.138	108.057	120.831	133.605
1122.4	Lower	0	0.07	0.05	502	78	48	0.09	0.03	1.876	143.27	151.408	159.545
1127.1	Lower	1.48	3.95	0.1	446	127	3	3.12	0.27	0.868	92.2934	108.204	124.114
1131.74	Lower	1	2.66	0.16	449	80	5	3.35	0.27	0.922	95.6055	110.809	126.012
1141.41	Lower	0.01	0.09	0.04	436	79	32	0.11	0.09	0.688	80.5892	99.1882	117.787
1150.62	Lower	0	0.01	0.05	481	31	139	0.04	0	1.498	126.445	136.352	146.259
1155.43	Lower	0.01	0.08	0.04	465	44	24	0.18	0.11	1.21	111.953	124.044	136.136
1164.9	Lower	0	0.03	0.04	493	67	80	0.05	0.03	1.714	136.329	145.09	153.851
1174.62	Lower	0	0.03	0.05	482	24	43	0.12	0.04	1.516	127.298	137.095	146.891
1193.67	Lower	0	0.04	0.06	481	35	55	0.12	0.07	1.498	126.445	136.352	146.259
1203.28	Lower	0.89	1.87	0.15	461	53	4	3.53	0.32	1.138	108.057	120.831	133.605
1208.1	Lower	0.01	0.04	0.07	496	28	56	0.13	0.22	1.768	138.685	147.217	155.749
1220.65	Lower	0.01	0.04	0.03	485	27	21	0.16	0.14	1.57	129.825	139.307	148.79
950.64	Lower	0.01	0.07	0.05	456.6	43.75	31.25	0.16	0.125	1.0588	103.631	117.226	130.821
957.65	Lower	0.02	0.09	0.11	447.4	64.2857	78.5714	0.14	0.181818	0.8932	93.8498	109.425	125
983.38	Lower	0.02	0.11	0.17	447.8	47.8261	73.913	0.23	0.153846	0.9004	94.291	109.772	125.253
1122.4	Lower	0.9	2.88	0.27	451.9	66.3594	6.2212	4.34	0.238095	0.9742	98.7277	113.287	127.847
1141.42	Lower	0.05	0.16	0.18	473.6	34.0426	38.2979	0.47	0.238095	1.3648	119.946	130.761	141.577
1040.86	Lower	0.02	0.07	0.08	485.5	50	57.1429	0.14	0.222222	1.579	130.241	139.674	149.106
1150.63	Lower	0.02	0.06	0.07	489.5	30	35	0.2	0.25	1.651	133.524	142.58	151.637
1155.43	Lower	0.02	0.08	0.06	476.7	27.5862	20.6897	0.29	0.2	1.4206	122.708	133.123	143.538
1174.62	Lower	0.01	0.06	0.07	494.3	28.5714	33.3333	0.21	0.142857	1.7374	137.355	146.014	154.674
1193.68	Lower	0.03	0.1	0.1	497.1	43.4783	43.4783	0.23	0.230769	1.7878	139.538	147.991	156.445
1220.65	Lower	0.02	0.09	0.09	501.8	27.2727	27.2727	0.33	0.181818	1.8724	143.12	151.269	159.419

## Sheet: Table S5
Table S5. Major element results for the Velkerri Formation
Sample No.	Sample ID.	Strat. Height (m)	Member	SiO2 (%)	TiO2 (%)	Al2O3 (%)	Fe2O3 (%)	MnO (%)	MgO (%)	CaO (%)	Na2O (%)	K2O (%)	P2O5 (%)	LOI (%)	Totals
2293040	20150102	394.1	Upper	67.2	0.8	18.6	2.2	0.01	0.7	0.2	0.2	3.7	0.07	7.49	101.17
2293041	20150103	396.475	Upper	62.4	0.8	19.2	2.9	0.02	1	0.2	0.2	3.8	0.06	9.68	100.26
2293042	20150104	401.195	Upper	62.5	0.8	19.9	3.3	0.03	1.2	0.1	0.2	4	0.06	7.59	99.68
2293043	20150105	405.895	Upper	66.9	0.8	16.5	4.2	0.07	1.1	0.1	0.2	3.7	0.05	6.47	100.09
2293044	20150106	410.545	Upper	34.9	0.5	11.4	28.7	0.43	2.6	0.5	0.2	2.2	0.08	18.76	100.27
2293045	20150107	415.15	Upper	58.4	0.9	19.4	6.9	0.07	1.8	0.2	0.2	3.8	0.06	8.93	100.66
2293046	20150108	419.855	Upper	57.3	0.9	21.3	4.9	0.02	1.3	0.1	0.2	3.8	0.06	10.75	100.63
2293047	20150109	424.61	Upper	55.4	0.8	18.8	9.1	0.07	1.6	0.2	0.2	3.7	0.06	10.51	100.44
2293048	20150110	429.265	Upper	59.8	0.9	20.6	4.6	0.03	1.4	0.1	0.2	4.1	0.06	8.47	100.26
2293049	20150111	433.875	Upper	59.5	0.8	18.4	7	0.05	1.5	0.1	0.2	3.6	0.05	9.15	100.35
2293050	20150112	438.53	Upper	51.2	0.8	18.8	11.6	0.14	2	0.4	0.2	3.4	0.06	11.7	100.3
2293051	20150113	443.265	Upper	57.9	0.9	20.6	5.8	0.04	1.5	0.2	0.3	3.8	0.06	9.83	100.93
2293052	20150114	447.95	Upper	59.3	0.9	19.3	5.9	0.03	1.5	0.1	0.3	3.8	0.05	8.72	99.9
2293053	20150115	452.635	Upper	53	1	21.7	7	0.06	1.7	0.2	0.2	3.8	0.08	10.4	99.14
2293054	20150116	457.055	Upper	61.2	0.9	18.7	5.5	0.03	1.3	0.1	0.2	3.8	0.06	7.89	99.68
2293055	20150117	468.995	Upper	58.2	1	19.2	7	0.05	1.6	0.1	0.2	3.7	0.06	8.98	100.09
2293056	20150118	471.235	Upper	69.1	0.7	13.4	5.2	0.05	1.2	0.1	0.2	2.8	0.05	6.75	99.55
2293057	20150119	475.905	Upper	64.9	0.8	15.6	5.3	0.02	1.2	0.1	0.2	3.3	0.05	8.33	99.8
2293058	20150120	480.645	Upper	29.7	0.3	9.2	33.8	0.33	2.9	0.8	0.2	1.6	0.07	20.61	99.51
2293059	20150121	485.445	Upper	61.8	0.8	17.7	6.2	0.03	1.3	0.1	0.2	3.5	0.05	8.04	99.72
2293060	20150122	490.135	Upper	53.9	0.8	18.6	6.6	0.02	1.4	0.1	0.3	3.7	0.05	14.51	99.98
2293061	20150123	494.765	Upper	63.3	0.8	18.1	4.8	0.02	1.2	0.1	0.3	3.5	0.06	7.86	100.04
2293062	20150124	499.485	Upper	55.4	1	22.4	5.6	0.03	1.5	0.1	0.3	3.8	0.07	9.8	100
2293063	20150125	504.345	Upper	57.4	1	22	4.3	0.02	1.5	0.1	0.3	3.9	0.07	9.7	100.29
2293064	20150126	509.16	Upper	56.4	0.9	21	6.1	0.02	1.4	0.1	0.3	3.7	0.08	10.35	100.35
2293065	20150127	518.05	Upper	58.7	0.9	20.3	5.7	0.03	1.6	0.1	0.2	3.6	0.06	8.81	100
2293066	20150128	522.745	Upper	57.6	1	20.7	4.8	0.02	1.5	0.1	0.3	3.9	0.06	10.35	100.33
2293067	20150129	527.37	Upper	57.8	0.9	19.7	5.8	0.02	1.3	0.1	0.3	3.4	0.06	10.9	100.28
2293068	20150130	532.01	Upper	55.9	1	21.2	6.8	0.05	1.6	0.2	0.3	3.6	0.07	9.57	100.29
2293069	20150131	536.75	Upper	55.8	0.9	20.1	5.8	0.02	1.4	0.1	0.3	3.6	0.06	11	99.08
2293070	20150132	541.46	Upper	55.7	0.9	20.2	5.8	0.02	1.3	0.1	0.3	3.4	0.05	11.93	99.7
2293071	20150133	545.975	Upper	55.4	0.9	20.2	7.6	0.04	1.5	0.1	0.3	3.5	0.07	10.12	99.73
2293072	20150134	550.715	Upper	54.4	1	20.3	7.1	0.04	1.5	0.1	0.3	3.6	0.07	10.97	99.38
2293073	20150135	555.24	Upper	52.8	0.9	19	10.2	0.09	1.8	0.3	0.3	3.2	0.07	11.22	99.88
2293074	20150136	559.985	Upper	56.3284	0.953026	20.3675	7.42453	0.05	1.55207	0.136147	0.217835	3.57612	0.06	9.24	99.9056
2293075	20150137	564.75	Upper	54	0.9	20.6	5.9	0.01	1.1	0.1	0.3	3.5	0.09	13.31	99.81
2293076	20150138	569.505	Upper	58.6	0.9	19.1	6.8	0.05	1.8	0.2	0.2	3.6	0.06	8.86	100.17
2293077	20150139	574.4	Upper	54.4	1.1	20.2	8.4	0.07	1.8	0.2	0.2	3.6	0.07	10.16	100.2
2293078	20150140	579.02	Upper	49.9	0.9	19.4	11	0.11	2.2	0.3	0.3	3.4	0.07	12.87	100.45
2293079	20150141	583.485	Upper	54.7	1	20.2	7.7	0.05	1.9	0.2	0.3	3.7	0.07	10.4	100.22
2293080	20150142	588.245	Upper	56.4	1.1	20.5	5	0.02	1.5	0.1	0.4	3.8	0.07	11.62	100.51
2293081	20150143	593.09	Upper	48.3	0.9	18.1	13.8	0.17	2.3	0.3	0.3	3.1	0.07	13.12	100.46
2293082	20150144	597.905	Upper	56.3	0.8	20.5	4.9	0.02	1.4	0.1	0.5	3.4	0.06	12.11	100.09
2293083	20150145	602.765	Upper	51.7	0.9	19.4	10.2	0.08	2.4	0.3	0.4	3.3	0.07	12.15	100.9
2293084	20150146	607.595	Upper	56	0.9	19.2	8.1	0.05	1.8	0.2	0.4	3.3	0.07	10.25	100.27
2293085	20150147	612.34	Upper	47.1	0.8	17.1	14.8	0.12	2.8	0.5	0.3	2.9	0.08	14.12	100.62
2293086	20150148	617.12	Upper	55.3	0.9	19.5	7.7	0.04	1.6	0.2	0.4	3.3	0.06	10.85	99.85
2293087	20150149	621.84	Upper	61.8	0.6	13.7	5.1	0.02	1.4	0.6	0.7	3	0.42	12.16	99.5
2293088	20150150	626.555	Upper	64.5	0.6	14	4.2	0.02	1.7	0.6	0.7	3.5	0.43	9.77	100.02
2293089	20150151	631.295	Upper	57.1	0.9	18.6	5.4	0.02	1.4	0.2	0.4	3.4	0.15	11.89	99.46
2293090	20150152	636.115	Upper	50.8	0.8	16.2	6.6	0.06	3.3	3.6	0.3	3.3	0.14	14.8	99.9
2293091	20150153	640.98	Upper	58.1	0.7	16.2	5.3	0.02	1.5	0.5	0.7	3.2	0.35	13.54	100.11
2293092	20150154	645.75	Upper	58.1	0.6	13.5	5.1	0.02	1.4	0.4	0.6	3.1	0.28	12.93	96.03
2293093	20150155	650.495	Upper	66.8	0.6	12.5	3.8	0.02	1.6	0.8	0.7	3.4	0.45	9.04	99.71
2293094	20150156	655.27	Upper	61	0.6	12.9	5.3	0.02	1.6	0.8	0.9	3.5	0.43	12.88	99.93
2293095	20150157	661.975	Upper	66.3	0.5	12.2	3.4	0.01	1.5	0.8	0.8	3.2	0.55	10.68	99.94
2293096	20150158	664.685	Upper	52.6	0.4	9	6.7	0.09	4.3	6.8	0.4	2.5	0.44	16.72	99.95
2293097	20150159	669.51	Upper	57	0.4	9.2	6.1	0.07	3.1	4.6	0.5	2.5	0.62	15.31	99.4
2293098	20150160	674.32	Middle	64.8	0.5	11.6	3.9	0.02	1.3	0.9	0.9	3.1	0.55	11.91	99.48
2293099	20150161	679.11	Middle	69.6	0.5	10.5	3.3	0.02	1.5	1.3	0.8	2.7	0.66	9.14	100.02
2293100	20150162	688.61	Middle	61.2	0.5	10.7	5.8	0.02	1.2	0.9	1	2.6	0.57	15.15	99.64
2293101	20150163	697.9	Middle	61.9	0.4	9.5	5.9	0.03	1.6	1.9	0.9	2.3	0.57	14.6	99.6
2293102	20150164	707.305	Middle	60.7	0.5	11.3	5.8	0.02	1.1	0.9	0.9	2.4	0.42	15.77	99.81
2293103	20150165	722.045	Middle	60.4	0.5	12.5	5.8	0.02	1.3	0.8	1	2.5	0.48	15.15	100.45
2293104	20150166	731.535	Middle	63.2	0.8	18.1	3.6	0.02	1.4	0.3	1	3	0.13	8.45	100
2293105	20150167	736.33	Middle	52.1	0.6	13.7	8.4	0.02	1.2	1.1	1.2	2.4	0.73	18.81	100.26
2293106	20150168	746.02	Middle	57.2	0.6	14.6	6	0.02	1.6	0.8	1.2	2.8	0.5	14.48	99.8
2293107	20150169	750.275	Middle	59.5	0.7	16	9.2	0.06	2.5	0.3	0.9	2.5	0.1	8.4	100.16
2293108	20150170	754.96	Middle	63.3	0.8	17.8	4.7	0.02	1.9	0.1	0.8	3.1	0.06	6.84	99.42
2293109	20150171	760.325	Middle	56.3	0.6	15.6	6.1	0.02	1.5	0.8	1.1	2.6	0.45	14.49	99.56
2293110	20150172	765.29	Middle	56.7	0.7	15.9	6.3	0.02	1.6	0.6	1.1	2.5	0.4	13.72	99.54
2293111	20150173	769.64	Middle	57.2	0.6	15	7.1	0.02	1.6	0.9	1.3	2.4	0.53	15.91	102.56
2293112	20150174	783.81	Middle	56.2	0.6	15.3	5.1	0.02	1.7	1.3	1.2	2.4	0.83	14.55	99.2
2293113	20150175	793.365	Middle	56.6	0.5	12.6	5.5	0.02	1.5	1.6	1.2	2.3	0.98	17.39	100.19
2293114	20150176	802.74	Middle	66.7	0.4	9.9	3.2	0.02	1.3	1.5	1	1.8	0.86	12.67	99.35
2293115	20150177	812.11	Middle	67.9	0.4	10.8	2.6	0.02	1.5	1.5	0.9	1.9	0.78	11.65	99.95
2293116	20150178	821.78	Middle	68.3	0.4	10.5	2.3	0.02	1.5	1.7	1	2.1	0.92	11.23	99.97
2293117	20150179	831.205	Middle	63.9	0.3	9.9	3	0.08	2.7	4	0.8	1.9	0.77	12.95	100.3
2293118	20150180	845.475	Middle	74.1	0.3	8.2	2.7	0.03	1.4	1.7	0.7	1.5	0.88	8.42	99.93
2293119	20150181	854.93	Middle	72.3	0.4	9.3	3.2	0.02	1.3	1.4	0.9	1.7	0.89	9.17	100.58
2293120	20150182	864.5	Middle	68.3	0.4	10.9	3.1	0.02	1.5	1.8	1.1	2.1	1.15	9.2	99.57
2293121	20150183	873.765	Middle	69	0.5	12.7	3.5	0.02	1.7	1.4	1.1	2.5	0.89	6.95	100.26
2293122	20150184	883.625	Middle	67.3	0.5	12	3.8	0.03	1.5	1.3	1.2	2.4	0.8	8.98	99.81
2293123	20150185	898.25	Middle	53.6	0.4	7.9	5.3	0.9	3.9	9.4	0.7	1.7	0.87	16.39	101.06
2293124	20150186	912.365	Middle	71.6	0.3	8.1	5.3	0.08	1.7	2	0.7	1.4	0.93	7.76	99.87
2293125	20150187	922.045	Middle	63.3	0.5	11.1	6	0.04	1.7	1.4	0.9	2.2	0.63	11.9	99.67
2293126	20150188	926.59	Middle	61.6	0.5	11.2	6.6	0.02	1.5	1.1	1.1	2.1	0.63	13.06	99.41
2293127	20150189	931.525	Middle	61.8	0.5	10.2	5.7	0.07	1.6	2.6	1	2.1	1.16	13.2	99.93
2293128	20150190	940.685	Middle	65.5	0.5	11.2	5.8	0.02	1.7	1.1	1.1	2	0.65	9.89	99.46
2293129	20150191	950.64	Lower	69.3	0.5	15	3.8	0.02	1.8	0.2	1	2.9	0.05	5.33	99.9
2293130	20150192	957.65	Lower	66.2	0.7	15.1	6.4	0.03	2.3	0.3	0.9	2.4	0.13	5.78	100.24
2293131	20150193	983.375	Lower	68.5	0.7	15.6	3.9	0.03	1.5	0.2	1.2	2.5	0.03	5.61	99.77
2293132	20150194	1002.46	Lower	64.6	0.8	17.2	4.4	0.05	1.5	0.2	1.7	2.6	0.03	6.19	99.27
2293133	20150195	1019.75	Lower	58.8	0.8	19.7	4.9	0.19	1.5	1.4	2.7	2.3	0.04	7.51	99.84
2293138	20150200	1040.86	Lower	70.5	0.5	12.9	5.8	0.06	1.6	0.5	1	2.1	0.27	4.39	99.62
2293142	20150204	1055.15	Lower	61.5	0.5	15.6	5.1	0.15	1.7	1.1	1	3	0.04	10.98	100.67
2293134	20150196	1088.21	Lower	59.3	1.1	21.2	5.2	0.03	1.6	0.2	1.3	4.3	0.07	5.95	100.25
2293139	20150201	1117.47	Lower	55.7	1.1	23.3	5.7	0.03	1.6	0.2	1.1	4.6	0.06	6.74	100.13
2293135	20150197	1122.4	Lower	60.8	0.9	19.3	5.6	0.05	1.4	0.2	1.3	3.1	0.04	6.89	99.58
2293140	20150202	1127.1	Lower	68.6132	0.653372	15.8926	4.46317	0.02	1.38957	0.156441	1.06748	3.20244	0.04	8.08	103.578
2293136	20150198	1131.74	Lower	59.4	0.7	17.7	6.4	0.03	1.7	0.1	1	3.8	0.04	9.4	100.27
2293137	20150199	1141.41	Lower	59.5	1.1	21.7	4.8	0.02	1.5	0.2	1.4	4.6	0.07	5.82	100.71
2293141	20150203	1150.62	Lower	61.1	0.8	18.7	7	0.07	1.6	0.2	1.1	2.9	0.07	6.25	99.79
2293143	20150205	1155.43	Lower	55.9	1	23.1	6.8	0.03	1.7	0.2	1.1	4.5	0.06	6.37	100.76
2293144	20150206	1164.9	Lower	62.5	0.7	19.1	6.2	0.03	1.5	0.1	1.3	3.4	0.03	5.2	100.06
2293145	20150207	1174.62	Lower	58	0.9	20.1	8.1	0.04	1.9	0.2	1.1	3.6	0.05	5.72	99.71
2293146	20150208	1193.67	Lower	57.9	0.9	21.6	6.8	0.03	1.8	0.1	1	3.8	0.05	6.05	100.03
2293147	20150209	1203.28	Lower	61.9	0.7	17.3	4.7	0.02	1.6	0.2	0.9	3.8	0.1	9.22	100.44
2293148	20150210	1208.1	Lower	63.8	0.6	15.1	6.1	0.13	2.6	1.2	0.7	3.4	0.06	6.41	100.1
2293149	20150211	1220.65	Lower	64.4	0.6	17.3	7.2	0.04	1.7	0.1	0.6	3.4	0.04	4.96	100.34

## Sheet: Table S6
Table S6. Trace elment results for the Velkerri Formation
Sample No.	Sample ID.	Strat. Height (m)	Member	Co	Sc	V	Mo	Cs	Rb	Ba	Th	U	Nb	Ta	Pb	Sr	Zr	Ti	Hf	La	Ce	Pr	Nd	Sm	Eu	Gd	Tb	Dy	Y	Ho	Er	Yb	Lu
2293040	20150102	394.1	Upper	<10	13.9	90.1	0.71	13.7	180	500	21.9	3.6	19.6	1.6	25.9	214	279	4794.79	7.9	57	122	13.3	51.6	11.6	2	9.4	1.4	8.1	46	1.6	4.3	4.1	0.62
2293041	20150103	396.475	Upper	18	17.3	96	0.8	15.5	189	664	21.9	3.8	20.1	1.6	26.2	170	257	4794.79	7.3	56	119	12.8	45	7.8	1.4	6.5	1.1	6.4	38	1.3	3.9	4	0.63
2293042	20150104	401.195	Upper	15	16.1	99.6	1.13	17.8	206	459	19.2	3.6	20	1.6	32.5	142	240	4794.79	6.7	53.7	119	12.2	43.7	7.2	1.3	5.4	0.9	5.7	32	1.2	3.4	3.5	0.5
2293043	20150105	405.895	Upper	17	13.6	79.9	1.62	13.4	179	622	23.3	4.2	19.2	1.8	22	125	364	4794.79	10.6	54.6	113	12.8	46.3	8.5	1.8	7.6	1.6	8	41	1.8	5.1	5	1.07
2293044	20150106	410.545	Upper	35	31.6	117	0.44	12.5	134	294	14.8	2.5	12.7	1.1	19.6	113	151	2996.74	4.1	41.4	85.9	9.7	35.6	6.6	1.2	5.7	1	7.2	43	1.7	5.9	7.5	1.23
2293045	20150107	415.15	Upper	16	17.7	97.1	0.71	18.5	205	466	21.6	3.5	20.2	1.6	20.2	148	217	5394.14	6.1	58.2	123	13.4	48.4	8.8	1.6	6.7	1.1	6.4	36	1.3	3.8	3.7	0.59
2293046	20150108	419.855	Upper	20	19.1	105	1.43	18.7	211	471	23.4	4.1	22	1.7	29.3	157	220	5394.14	6.3	63.6	134	14.5	52.3	8.9	1.7	6.6	1.1	6.3	34	1.2	3.6	3.6	0.5
2293047	20150109	424.61	Upper	24	19.3	98.5	0.7	17.8	199	466	21.6	3.4	18.7	1.5	21.9	135	209	4794.79	5.9	56.6	121	13	47	8.5	1.5	6.4	1	6.2	34	1.2	3.8	4	0.57
2293048	20150110	429.265	Upper	18	16	103	1.02	19.1	215	520	21.3	4	21.8	1.8	24.2	155	287	5394.14	7.9	63.3	139	14.8	52.3	8.8	1.5	7	1.1	6.5	40	1.3	3.7	3.4	0.53
2293049	20150111	433.875	Upper	25	15.9	95.5	0.87	15.1	185	565	22.2	3.9	19.4	1.6	28.7	133	261	4794.79	6.8	57.9	122	13.1	46.6	7.9	1.5	6.6	1.1	6.7	34	1.3	4	4.2	0.64
2293050	20150112	438.53	Upper	18	21.8	113	0.8	16.5	194	429	21.6	3.6	19.9	1.6	22.2	144	207	4794.79	5.8	57.2	125	13	46.7	8.5	1.6	6.7	1.1	6.7	36	1.4	4	4.4	0.63
2293051	20150113	443.265	Upper	17	17.5	111	0.55	17.4	203	408	18.8	3.8	20.6	1.6	26.4	143	210	5394.14	5.8	55.6	123	12.6	44.9	7.9	1.3	5.6	0.8	5.3	30	1	3	3.1	0.45
2293052	20150114	447.95	Upper	20	17.3	97.3	0.85	16	197	538	23.9	4	21	1.6	33.9	124	274	5394.14	7.6	59.6	125	13.3	47	7.9	1.5	6.7	1.1	6.6	35	1.4	3.9	4.1	0.64
2293053	20150115	452.635	Upper	15	22	124	1.12	21.1	219	424	33.6	4.9	26.5	2.2	29.4	164	260	5993.49	7.5	88.4	185	19.9	71.1	12.1	2.2	8.6	1.4	7.9	38	1.6	4.8	4.9	0.87
2293054	20150116	457.055	Upper	25	16	91	0.84	15	197	544	24.7	4.2	21.1	1.7	30.9	121	307	5394.14	8.7	58.6	125	13.6	49.9	9	1.5	7	1.1	7	34	1.3	4.2	4.2	0.62
2293055	20150117	468.995	Upper	21	20.1	124	0.97	18.3	226	554	29.6	5	26.8	2.1	35.5	135	323	5993.49	8.8	78.3	162	17.8	63.4	11.2	2.1	9	1.4	8.6	39	1.7	5	5.3	0.8
2293056	20150118	471.235	Upper	20	10.5	61.7	0.37	7.9	127	966	26.4	4.8	17	1.4	18.5	87	576	4195.44	15.6	57.3	120	13.7	51	10.4	1.7	9.5	1.6	10	50	2	6.1	5.8	0.95
2293057	20150119	475.905	Upper	22	13.5	81.1	0.67	11.5	162	766	19.3	3.9	19.5	1.6	28.4	103	266	4794.79	7.6	49.5	104	11.5	41.6	7.2	1.4	6.8	1	6.2	33	1.2	3.5	3.5	0.55
2293058	20150120	480.645	Upper	18	21.1	91.9	0.91	6.6	88.8	306	11.9	2	9.4	0.8	17.2	60	126	1798.05	3.3	27.9	59.9	6.4	23.3	4	0.8	4.2	0.8	5.5	34	1.4	4.7	6	0.99
2293059	20150121	485.445	Upper	19	15.7	101	1.5	13.2	179	582	21.1	3.8	18.6	1.5	29.8	103	254	4794.79	7	51.5	108	12.4	44.6	8.3	1.5	7.1	1.1	7	34	1.4	4	4	0.59
2293060	20150122	490.135	Upper	28	19	123	0.92	18.3	222	440	25.5	4.2	21.7	1.7	45	125	253	4794.79	7.2	68.1	143	15.9	57.4	9.5	1.7	7.7	1.2	7.5	32	1.4	4.3	4.3	0.63
2293061	20150123	494.765	Upper	23	14.3	90.1	0.82	13.5	186	555	21.9	3.8	19.7	1.6	30.5	102	291	4794.79	8.1	56.4	120	12.9	46.7	8.1	1.4	6.8	1.1	6.8	34	1.3	3.8	3.9	0.55
2293062	20150124	499.485	Upper	23	7.4	127	1.31	17.9	167	423	18.3	4.6	24.2	1.9	33.7	150	237	5993.49	6.8	55.2	157	15	55.4	9.7	1.7	7.6	1.1	7.2	38	1.4	4	4	0.63
2293063	20150125	504.345	Upper	27	6.4	123	1.13	18.7	165	415	18.2	4.2	23.9	1.8	28.2	139	229	5993.49	6.4	54.1	152	15	55.2	10.2	1.9	8.3	1.2	7.7	40	1.5	4.2	4	0.55
2293064	20150126	509.16	Upper	26	17.5	122	1.08	18.2	203	414	26	4.2	23	1.8	34.4	145	250	5394.14	6.9	71.8	160	17.4	63.3	11.3	2.2	9.5	1.5	8.5	41	1.7	4.8	4.6	0.68
2293065	20150127	518.05	Upper	26	14.1	116	1.14	15.5	186	461	20.7	3.8	21	1.7	28.6	115	226	5394.14	6.4	54.7	127	13.5	49.9	9	1.7	7.3	1.1	7	38	1.4	3.8	3.8	0.6
2293066	20150128	522.745	Upper	20	20	114	0.72	18.4	226	401	26.2	4	22.6	1.8	30.6	131	218	5993.49	6.1	73.4	153	16.8	61.9	10.4	2	8.4	1.3	7.8	37	1.6	4.3	4.2	0.61
2293067	20150129	527.37	Upper	22	16.4	110	0.83	15.3	198	478	30.5	5.1	22.8	1.8	43.9	121	393	5394.14	10.9	77	162	17.9	64.9	11.7	2.1	10.2	1.6	9.5	46	1.9	5.4	5.5	0.82
2293068	20150130	532.01	Upper	20	20.7	121	0.89	17.6	211	431	27	4.5	23.7	1.9	31.8	134	241	5993.49	6.9	73.2	155	17.1	62.5	11	2.1	9	1.4	8.4	42	1.7	5	4.9	0.77
2293069	20150131	536.75	Upper	22	20.1	112	0.79	17.2	209	416	28	4.1	22.9	1.8	37.4	120	227	5394.14	6.4	70.9	150	16.4	60.2	10.8	2	8.4	1.3	8	38	1.6	4.6	4.5	0.67
2293070	20150132	541.46	Upper	33	18.3	117	1.16	16.2	203	415	25.8	4	21.7	1.7	41.6	109	223	5394.14	6.4	61.4	127	14.1	50.5	9	1.7	7.8	1.2	7.1	35	1.4	4.1	3.9	0.52
2293071	20150133	545.975	Upper	27	19.7	131	2.38	15.8	198	424	27.8	4.8	22.9	1.8	46.9	117	257	5394.14	7	67.6	143	16	58.2	11.4	2	9	1.4	8.7	43	1.7	5	5	0.74
2293072	20150134	550.715	Upper	19	20.1	121	1.02	17.1	215	540	28.6	4.4	23.8	1.9	41.7	129	234	5993.49	6.8	73.6	152	17	62.3	10.9	2	9	1.4	8.6	38	1.6	4.6	4.7	0.71
2293073	20150135	555.24	Upper	20	22.1	105	0.67	14.7	185	361	25.4	3.8	21.1	1.7	33	115	215	5394.14	6.3	66.7	141	15.6	57.2	11	1.8	8.9	1.4	8.6	41	1.7	5	5.2	0.75
2293074	20150136	559.985	Upper	20	19.5	117	1.21	15.7	199	408	24.8	4.4	22.9	1.8	34.6	121	231	5711.95	6.7	65.9	143	15.6	58	10.3	2	8.7	1.4	8.4	42	1.6	5	5	0.74
2293075	20150137	564.75	Upper	12	20.4	153	2.29	17.2	203	388	29.1	5	23.4	1.8	51.5	127	230	5394.14	6.4	73.9	154	17	61.4	11.3	2	8.6	1.4	8	39	1.5	4.6	4.5	0.7
2293076	20150138	569.505	Upper	17	17.8	103	0.93	14.3	199	422	26.2	4	22.9	1.8	26.8	112	272	5394.14	7.7	62.6	136	14.8	54.8	9.8	1.8	8.4	1.4	8.6	39	1.6	4.8	4.9	0.72
2293077	20150139	574.4	Upper	22	20.6	118	0.97	15.7	204	394	30.6	5	26.9	2.1	41.5	134	336	6592.84	9.1	83.6	178	19.5	71.8	12.7	2.3	10.4	1.6	10.4	50	2	5.8	5.7	0.86
2293078	20150140	579.02	Upper	20	23.1	121	1.25	15	192	375	28.1	4.3	24	1.9	30.7	126	251	5394.14	7.3	73	156	17.3	64.2	11.8	2.1	9.5	1.5	9.1	44	1.8	5.4	5.7	0.86
2293079	20150141	583.485	Upper	23	20.5	122	0.76	15.8	210	407	27.4	4.6	23.5	2	29.9	123	258	5993.49	7.4	75.5	159	17.9	63.4	11.5	2.1	9.6	1.5	8.9	47	1.8	5.3	5.5	0.8
2293080	20150142	588.245	Upper	18	17.6	127	1.08	18.2	225	412	33.4	5.1	27.1	2.2	42.6	142	309	6592.84	8.7	88.7	185	20.4	72.7	12.2	2.3	10.2	1.6	9.8	46	1.9	5.5	5.5	0.8
2293081	20150143	593.09	Upper	21	17.8	121	1.4	14.7	175	350	24.5	4.3	21.7	1.8	41.1	126	227	5394.14	6.3	66.9	151	16.2	60.9	11	2	8.4	1.4	8.6	44	1.7	5.3	5.4	0.78
2293082	20150144	597.905	Upper	32	16.2	125	1.44	15.9	191	352	27.7	4.4	23.3	1.8	38.7	116	255	4794.79	7.7	70.4	151	16.7	61.1	11.1	1.8	9.4	1.6	9.6	43	1.9	5.4	5.2	0.78
2293083	20150145	602.765	Upper	16	21	116	1	14.4	184	352	26.8	4.1	21.8	1.8	27.8	126	215	5394.14	6.1	69	146	16.2	58.4	10.1	2	8.5	1.4	8.7	41	1.6	4.9	4.7	0.71
2293084	20150146	607.595	Upper	22	19.7	129	2.03	13.5	186	394	25.1	4.5	22.3	1.8	39.4	114	254	5394.14	7.3	63.8	138	15.8	57.5	10.5	2	9.3	1.5	8.6	40	1.7	4.9	4.9	0.7
2293085	20150147	612.34	Upper	19	20.5	103	1.81	11.8	161	320	22.9	3.6	19.5	1.6	25.3	107	189	4794.79	5.3	59.5	127	14	51.8	9.7	1.9	8.4	1.3	8.5	39	1.6	5	5.3	0.79
2293086	20150148	617.12	Upper	22	22.8	131	2.18	14.8	203	433	38.4	4.8	25.2	1.9	55.2	119	252	5394.14	7.1	78.5	163	18.6	68.1	12.1	2.3	10.2	1.6	10	40	2	6.1	6.2	0.92
2293087	20150149	621.84	Upper	30	14.5	362	17.1	11.2	151	294	16.8	7.2	13.7	1.2	53.8	83	180	3596.09	5.2	48.4	97.6	12.4	46.9	10	1.9	9.2	1.5	8.8	49	1.7	5	4.8	0.74
2293088	20150150	626.555	Upper	18	13.1	157	4.81	11.3	173	293	16.7	4.3	16.5	1.3	51.9	78	240	3596.09	6.9	46.8	94.3	12.4	48	9.5	1.8	9.4	1.6	9.5	53	2	6	5.9	0.88
2293089	20150151	631.295	Upper	24	19.2	179	4.4	14.6	194	382	24.3	5.1	21	1.7	46	104	243	5394.14	6.8	63.4	134	15.3	57.4	10.8	2	9	1.4	8.4	41	1.6	4.6	4.6	0.67
2293090	20150152	636.115	Upper	27	19.6	138	4.36	13.7	188	360	27.3	4.6	22	1.8	44.6	101	266	4794.79	7.7	61.8	128	14.7	55.7	11.7	2.1	10.4	1.7	10	44	1.9	5.5	5	0.73
2293091	20150153	640.98	Upper	23	17.3	273	10.37	13.9	180	341	21.8	6.8	20.5	1.7	55	91	266	4195.44	7.4	60.7	124	15.3	58.5	12	2.2	11.9	1.8	11.3	54	2.2	6.7	6.2	0.97
2293092	20150154	645.75	Upper	30	13.7	246	9.68	11.7	161	333	16.6	5.8	15.4	1.4	49.7	85	190	3596.09	5.3	54.5	104	13.4	50.2	8.9	1.6	8.2	1.3	8.2	40	1.7	4.9	5	0.74
2293093	20150155	650.495	Upper	17	12.8	222	6.91	10.4	150	361	15.3	5.8	13.4	1.1	31.5	82	190	3596.09	5.1	46.2	85.4	11.7	44.8	8.7	1.7	8.2	1.3	8.1	47	1.8	5.1	4.9	0.81
2293094	20150156	655.27	Upper	27	13.1	180	7.24	10.5	164	355	15.5	4.7	14.6	1.2	50.7	85	190	3596.09	5.4	44.3	84.4	11.5	44.1	9.5	1.8	8.5	1.4	8.5	46	1.7	5.2	4.9	0.76
2293095	20150157	661.975	Upper	17	11	409	12.34	9.6	139	339	14.1	6.5	12.4	1.1	34	81	173	2996.74	5	43	81.5	11	42.6	8.7	1.4	7.7	1.2	7.7	43	1.5	4.6	4.4	0.69
2293096	20150158	664.685	Upper	27	7.8	361	14.44	7.1	116	275	9.8	6.6	10	0.9	61.4	118	137	2397.4	3.8	36.8	67.7	9.6	39.3	8	1.6	8.7	1.4	8.7	53	1.9	5.6	5.6	0.85
2293097	20150159	669.51	Upper	27	10.6	574	42.48	7.2	117	337	10.5	10.9	10.4	0.8	49.7	98	134	2397.4	3.7	41.3	71.1	10.8	44.6	10	2	10.3	1.6	10.3	62	2.2	6.7	6.4	0.98
2293098	20150160	674.32	Middle	18	11.6	740	49.36	9.5	141	431	13.1	9.9	12.8	1	40	84	164	2996.74	4.7	47.1	78.7	11.6	45.1	8.1	1.6	8.1	1.3	7.9	51	1.8	5.3	5.4	0.86
2293099	20150161	679.11	Middle	22	10	338	19.81	7.4	113	450	11.7	6.3	10.7	0.9	24.5	79	137	2996.74	3.9	41.1	72.1	10.6	41.3	8.2	1.7	8.7	1.3	8.5	54	1.8	5.2	4.8	0.74
2293100	20150162	688.61	Middle	25	12.3	671	102	8.2	121	478	12.1	14.9	11.5	1	33.8	92	147	2996.74	4.1	44	72.9	11.2	45	9.2	1.9	10.4	1.7	11	73	2.4	7.6	7.1	1.18
2293101	20150163	697.9	Middle	36	10.7	574	101	8.1	112	454	11	13.1	10.3	0.8	32.5	93	134	2397.4	3.7	43.5	73.6	11	43.8	8.7	1.9	9.3	1.4	9.1	61	2.1	6.3	6	0.95
2293102	20150164	707.305	Middle	20	12.7	631	94.43	10.2	120	491	11.2	16.6	11	0.9	29.8	94	128	2996.74	3.5	40.3	68.6	9.9	37.9	7.2	1.5	7.6	1.2	7.7	55	1.7	5.4	5.3	0.85
2293103	20150165	722.045	Middle	26	14.3	475	79.11	11.1	132	490	12	17.2	11.5	0.9	34.2	102	134	2996.74	3.8	44.7	77.7	11	42.8	7.9	1.7	8.4	1.3	8.4	55	1.9	5.5	5.4	0.83
2293104	20150166	731.535	Middle	16	15.4	221	12.29	13.5	160	461	15.4	4.5	16	1.2	18.5	111	179	4794.79	5	46.8	94.4	11.4	43.3	8.1	1.6	7.1	1.1	6.8	39	1.4	4.1	4.2	0.65
2293105	20150167	736.33	Middle	28	16.9	307	66.96	12	136	347	14.4	13.4	13.1	1.1	53.1	119	167	3596.09	4.8	43.6	95.3	13.1	57.3	16.3	3.5	18.8	2.7	14.8	69	2.7	6.9	5.7	0.82
2293106	20150168	746.02	Middle	25	14.8	435	53.52	13	147	396	13.9	9.7	13.4	1	35.7	125	169	3596.09	4.6	47.6	92	12.1	48	9.7	2.1	9.8	1.5	9.2	54	1.8	5.4	5.2	0.76
2293107	20150169	750.275	Middle	26	15	117	4.32	12.4	150	450	6.2	3.5	14.8	1.1	40.6	109	163	4195.44	4.6	38.6	86.6	9.8	35.2	6.2	1.2	4.8	0.7	5	34	1	2.9	2.7	0.38
2293108	20150170	754.96	Middle	14	17.1	97.3	1.3	14.1	168	458	14.9	2.8	15.9	1.2	14	119	155	4794.79	4.5	45.2	92.4	11	40.8	6.7	1.2	5.2	0.9	5.7	35	1.2	3.5	3.4	0.53
2293109	20150171	760.325	Middle	23	15.9	410	70.23	13.3	150	381	16.3	12.3	15.1	1.2	40.5	126	167	3596.09	4.9	50.3	96.9	13	51.9	11.6	2.3	11.5	1.7	9.8	54	2	5.6	5.1	0.77
2293110	20150172	765.29	Middle	29	16.7	405	63.65	13.5	147	382	15.9	12.6	15.4	1.2	36.4	132	170	4195.44	4.9	51.2	96.7	12.5	49.9	9.8	2.1	10.1	1.5	9.4	55	1.9	5.4	5.3	0.86
2293111	20150173	769.64	Middle	105	15.3	473	91.85	11.7	132	380	14.9	14.8	13.7	1.3	56.5	118	185	3596.09	5.4	45.3	86.8	11.9	48.4	10.8	2.2	10.7	1.6	10	55	2.1	6	5.6	0.8
2293112	20150174	783.81	Middle	19	14.5	429	68.88	12.4	133	406	16.8	17.7	14.7	1.2	42	140	215	3596.09	6.1	58.4	104	14.9	61.4	13.6	2.6	14.4	2.1	12.7	76	2.6	7.7	7.1	1.11
2293113	20150175	793.365	Middle	17	11.5	349	91.39	10.1	116	452	13.5	26.6	13.5	1	42.6	160	221	2996.74	6.1	59.7	107	15.3	63.1	13.3	2.6	13.6	2	12.8	83	2.7	8.3	7.6	1.19
2293114	20150176	802.74	Middle	19	9.1	418	70.46	7.7	94.3	409	12.3	19.1	11.9	0.9	41	128	156	2397.4	4.3	50.2	87.8	12.9	51.9	10.9	2	11.6	1.9	12.4	81	2.6	8.2	8.2	1.27
2293115	20150177	812.11	Middle	15	8.7	364	39.13	9.1	86.5	411	12	13.4	9.6	0.8	36.4	120	162	2397.4	4.7	42.6	79.4	10.7	43.3	8.5	1.7	9	1.4	9.1	62	2	5.8	5.8	0.88
2293116	20150178	821.78	Middle	20	8.7	244	14.99	8.9	97.7	390	10.5	11.6	10	0.8	33.6	120	143	2397.4	4.4	46.1	89	12	48.3	10.1	1.9	9.7	1.5	9.8	63	2	6.2	6.1	0.95
2293117	20150179	831.205	Middle	13	10.6	212	32.89	8.9	84.8	375	13.8	9.2	10.7	0.9	17.1	151	159	1798.05	4.7	47.4	91.5	12.2	47.8	9.5	1.9	9.4	1.4	9.7	61	1.9	5.8	5.7	0.83
2293118	20150180	845.475	Middle	18	8.2	137	8.92	5.6	69.7	312	7.8	4.5	7.7	0.7	19	97	105	1798.05	3.1	33.2	58.2	8.5	33.9	7.3	1.5	7.5	1.2	7.4	49	1.6	4.6	4.5	0.68
2293119	20150181	854.93	Middle	16	9.5	285	13.03	6.9	82.7	311	8.9	5.8	9	0.7	21	90	126	2397.4	3.5	36.1	66.6	8.9	36.6	7.5	1.6	7.9	1.3	8.3	54	1.7	5.2	4.9	0.82
2293120	20150182	864.5	Middle	17	10.4	306	23.73	8.6	101	320	10.7	7.8	10	0.9	29.8	103	172	2397.4	4.9	45.4	83.6	11.8	47.9	9.8	2	10.3	1.7	10.1	65	2.2	6.3	6.3	0.95
2293121	20150183	873.765	Middle	16	9.8	245	4.94	9.4	113	328	11.3	5.8	11.6	0.9	24.9	93	173	2996.74	5.2	37.9	70.9	9.2	35.9	7.2	1.4	7.3	1.2	7.5	47	1.5	4.8	4.6	0.69
2293122	20150184	883.625	Middle	25	8.6	250	18.38	9.5	116	316	10.4	7.1	11.3	0.9	31.2	92	162	2996.74	4.7	39	71.2	9.3	36.6	7.5	1.6	7.5	1.2	7.9	50	1.7	5.1	5.2	0.83
2293123	20150185	898.25	Middle	23	7.7	201	5.75	6.8	83.7	261	7.6	4.1	8.4	0.7	22.8	131	115	2397.4	3.4	31.5	63.4	8.3	33.3	6.4	1.6	7.4	1.2	7.5	48	1.5	4.3	4.2	0.64
2293124	20150186	912.365	Middle	34	8.9	108	2.06	4.8	66.6	257	6.7	2.5	6.9	0.7	23.1	70	96.1	1798.05	2.8	32.9	63	9	36.9	7.6	1.5	8.1	1.2	7.6	50	1.5	4.2	4	0.64
2293125	20150187	922.045	Middle	25	15.6	387	22.01	9.5	112	318	8.5	10.8	8.3	0.7	26.5	72	128	2996.74	3.8	35.8	66.4	8.3	32	6.3	1.5	6.7	1.1	7	47	1.5	4.7	4.5	0.73
2293126	20150188	926.59	Middle	24	17.6	385	23.56	9.2	111	339	8.5	11.3	8	0.7	21.1	71	140	2996.74	3.8	35.3	65.2	8.3	32.1	6.2	1.5	6.7	1.1	7.3	43	1.5	4.7	4.9	0.74
2293127	20150189	931.525	Middle	31	11.9	432	61.55	9.5	109	337	10.2	18.4	10.2	0.8	26	90	140	2996.74	4.1	40.3	77	10.5	44.4	8.8	2	10	1.6	10.3	69	2.2	6.5	6.3	0.95
2293128	20150190	940.685	Middle	29	17.1	265	5.95	8.3	97.5	288	9.3	5.3	8.2	0.7	15.4	71	132	2996.74	3.9	28.1	53.7	6.7	25.9	4.7	1.2	5.4	0.9	6.1	37	1.3	3.9	4.1	0.59
2293129	20150191	950.64	Lower	16	13	60.4	0.4	11.8	129	314	12.6	2.1	11.2	0.9	15.6	78	201	2996.74	6	37.5	80.8	9.2	33.8	6	0.9	4.9	0.8	5.3	30	1.1	3.4	3.5	0.52
2293130	20150192	957.65	Lower	31	14.9	67.7	0.2	11.2	114	299	11.7	1.5	10.4	0.8	21.2	71	195	4195.44	5.9	33.3	76	9.2	37.5	8.7	1.7	7.9	1.2	6.7	34	1.2	3.6	3.6	0.57
2293131	20150193	983.375	Lower	16	12.9	53.8	0.87	9.7	113	404	12.2	1.8	11.9	0.9	16.6	79	230	4195.44	6.8	37.8	95.7	9.9	37.3	6.1	1.2	5.4	0.9	5.4	29	1.1	3.3	3.5	0.5
2293132	20150194	1002.46	Lower	19	14	74.1	0.71	10.1	116	398	13.6	2.2	12.3	1.1	21.5	70	238	4794.79	7.2	35.4	89.9	9.8	38.2	7.4	1.4	5.9	1	5.9	31	1.2	3.4	3.7	0.55
2293133	20150195	1019.75	Lower	20	14.8	61.3	1.02	8.5	101	746	15.1	2.8	14.9	1.2	28.1	93	315	4794.79	9.6	30.8	79.6	8.5	34	8	1.7	7.7	1.2	7.3	34	1.4	3.9	4	0.6
2293138	20150200	1040.86	Lower	20	11.7	50	0.33	7.1	101	312	11.5	1.9	9.7	0.8	17.5	55	164	2996.74	4.9	26.9	60.4	6.9	28.3	6.6	1.3	5.8	0.9	5.1	30	0.9	3	3	0.48
2293142	20150204	1055.15	Lower	19	12.7	75.3	5.38	11.5	163	348	24.5	5.5	14.9	1.4	85.5	66	224	2996.74	7.2	41.9	92.7	10.9	41.8	9.8	1.7	9.2	1.5	9.1	44	1.8	5.7	5.9	0.87
2293134	20150196	1088.21	Lower	20	21.5	116	7.06	13.6	220	437	26.2	4.7	25.7	2.1	21.7	106	277	6592.84	8.4	92.4	208	23.1	83.7	12.3	2.1	9.9	1.7	10.9	56	2.2	6.6	6.9	1.07
2293139	20150201	1117.47	Lower	21	23	125	0.86	15.1	241	444	25.7	4.2	23.6	1.9	20.8	101	246	6592.84	7.3	76	162	18.8	70.4	12	2	8.8	1.4	8.7	44	1.7	5.1	5.7	0.79
2293135	20150197	1122.4	Lower	19	17.8	86.7	0.48	13.8	141	397	15.7	2.1	14.5	1.1	22	83	285	5394.14	8.3	37	88.9	9.6	37.1	7.4	1.5	6	1	5.7	29	1.1	3.2	3.3	0.49
2293140	20150202	1127.1	Lower	60	14.2	70.2	2.09	12	173	392	17.6	3.4	14.5	1.3	26.7	77	207	3915.98	5.9	39.8	90	10	37.6	7.1	1.3	6.3	1	6.5	32	1.4	4.2	4.4	0.64
2293136	20150198	1131.74	Lower	21	16.9	90.9	5.95	13.8	208	406	21.4	4.3	16.3	1.3	25.5	77	228	4195.44	6.8	47.9	110	12.6	48.6	9	1.5	7.1	1.2	7.3	40	1.6	5.1	5.6	0.81
2293137	20150199	1141.41	Lower	21	21.1	115	0.43	16.3	243	446	22.4	4.3	22.1	1.8	18.5	101	265	6592.84	7.7	76.7	169	18.8	69.7	12.2	2.1	8.9	1.4	9.1	50	1.8	5.8	5.9	0.88
2293141	20150203	1150.62	Lower	21	15	66.1	0.48	12.7	136	385	16.2	2.1	14.1	1.1	18.2	71	258	4794.79	7.7	36.8	87.5	9.3	36.5	7.3	1.3	6	0.9	5.4	26	1.1	3.2	3.3	0.49
2293143	20150205	1155.43	Lower	22	14.2	124	0.58	15.2	198	431	19.5	4	22.4	1.8	20.3	97	247	5993.49	7.2	61.5	162	17.1	63	10.5	1.7	7.2	1.1	7.4	39	1.5	4.6	4.9	0.74
2293144	20150206	1164.9	Lower	25	15.8	84.7	0.28	10.6	183	328	14.2	2.7	15.3	1.3	14.8	65	175	4195.44	5	32.7	70	8.1	32	5.8	1.3	5.7	1	6.1	35	1.3	3.9	3.7	0.55
2293145	20150207	1174.62	Lower	23	18.8	101	0.2	13.1	198	352	18.8	3.4	18.5	1.5	19.1	79	198	5394.14	6	50	104	12.1	45.3	8.9	1.7	9	1.4	9.1	43	1.8	4.8	4.9	0.73
2293146	20150208	1193.67	Lower	22	20.6	109	0.59	12.8	203	393	20.6	3.4	19.1	1.6	20.1	78	186	5394.14	5.5	55.9	117	14	52.2	8.6	1.8	7.2	1.1	7.1	39	1.5	4.4	4.7	0.65
2293147	20150209	1203.28	Lower	17	18.9	173	12.7	15.4	214	392	17.8	5	14.1	1.2	40.2	76	173	4195.44	5	48.7	102	12.4	47.9	9.9	1.9	9.2	1.4	9.1	43	1.8	5	5.1	0.82
2293148	20150210	1208.1	Lower	29	14.6	59.3	0.52	15.2	201	328	14.9	2.5	12.2	1.1	360	53	169	3596.09	5	37.4	80.9	8.8	32.7	6.4	1.2	5.4	0.8	4.8	24.7	0.9	2.7	2.7	0.41
2293149	20150211	1220.65	Lower	22	13.3	69.1	0.37	11.8	185	319	18.1	2.5	13.9	1.2	18.9	59	200	3596.09	5.9	35.8	82.8	8.7	32.3	6.4	1.1	4.8	0.8	4.7	21	0.9	2.7	2.8	0.41

## Sheet: Table S8
Table S8. Correlation coefficients for key geochemical variables for the Velkerri Formation
Variables	S1	S2	S3	Tmax	U/Al	Mo/Al	V/Al	CIA	FeT/Al	TOC	Ce*(SN)	La/Lu	Y/Ho	F/K	ΣHFSE	Quartz	Kaolinite	ΣFeldspars	Illite	TOC	Glauconite	Smectite	Pyrite	Magnetite	Siderite	Dolomite
S1	1	0.860237	-0.101489	-0.207381	0.742013	0.657425	0.791358	-0.725727	-0.00845427	0.867258	-0.827224	-0.706758	0.588194	0.7244	-0.571869	0.749538	-0.768252	0.524361	-0.432616	0.867258	0.220734	-0.102763	0.52609	-0.461806	-0.177912	0.148825
S2		1	-0.0625597	-0.167549	0.869908	0.872385	0.900633	-0.638078	0.0124004	0.934649	-0.81643	-0.638949	0.519391	0.725072	-0.51973	0.593979	-0.708236	0.459283	-0.307369	0.934649	0.310974	0.0330882	0.694789	-0.456484	-0.146727	0.115571
S3			1	-0.154992	-0.0228726	-0.0437771	-0.00481046	0.0238692	0.880004	-0.05664	0.0121278	-0.203329	-0.116132	-0.100409	-0.146663	-0.225812	0.141286	-0.479853	-0.294669	-0.05664	-0.267509	-0.290792	-0.0513965	-0.0117325	0.922496	0.0528787
Tmax				1	-0.171457	-0.119356	-0.171833	0.0143728	-0.00708835	-0.17408	0.184429	-0.0727219	-0.0445272	-0.0627926	-0.152506	-0.0118634	-0.110604	0.0248268	0.1954	-0.17408	-0.129075	0.177087	-0.254275	0.29536	-0.0172452	-0.0493972
U/Al					1	0.909858	0.837228	-0.608611	0.0385516	0.896616	-0.758079	-0.598456	0.520681	0.666401	-0.455473	0.531101	-0.641681	0.407324	-0.299628	0.896616	0.316602	0.0457782	0.676497	-0.405761	-0.121055	0.134572
Mo/Al						1	0.847523	-0.512363	0.0485299	0.852902	-0.705972	-0.535414	0.445508	0.588339	-0.439661	0.432198	-0.5786	0.366859	-0.204031	0.852902	0.337866	0.109473	0.733195	-0.364147	-0.113659	0.0652393
V/Al							1	-0.709978	0.0850278	0.836747	-0.824888	-0.63802	0.529358	0.793982	-0.580836	0.57824	-0.716178	0.441411	-0.361451	0.836747	0.283747	-0.0742995	0.682077	-0.457368	-0.100035	0.256711
CIA								1	-0.0904808	-0.612805	0.688963	0.727525	-0.557862	-0.820827	0.605087	-0.66787	0.839655	-0.538509	0.523467	-0.612805	-0.120013	0.149286	-0.411416	0.291835	0.123746	-0.666426
FeT/Al									1	0.0104087	-0.0473502	-0.347715	-0.0465146	-0.041773	-0.275745	-0.0881045	-0.0173672	-0.376469	-0.403609	0.0104087	-0.18948	-0.388475	0.0703176	-0.0692364	0.945805	0.0755929
TOC										1	-0.801188	-0.665708	0.483614	0.65101	-0.532768	0.540405	-0.711805	0.430482	-0.2034	1	0.407431	0.12216	0.676202	-0.38672	-0.151647	0.0691449
Ce*(SN)											1	0.631385	-0.490059	-0.730398	0.552365	-0.665076	0.736459	-0.403063	0.379379	-0.801188	-0.331514	0.10294	-0.594559	0.514728	0.12316	-0.211976
La/Lu												1	-0.39294	-0.635405	0.529275	-0.611279	0.775764	-0.498103	0.51319	-0.665708	-0.0329887	0.0968225	-0.334226	0.324233	-0.18789	-0.217195
Y/Ho													1	0.580737	-0.57505	0.66944	-0.578294	0.478874	-0.478251	0.483614	0.0515421	-0.102087	0.244508	-0.31574	-0.15792	0.142299
F/K														1	-0.539178	0.733436	-0.834268	0.6429	-0.468932	0.65101	0.188575	-0.111598	0.409475	-0.446307	-0.182487	0.324002
ΣHFSE															1	-0.43951	0.605562	-0.206742	0.274311	-0.532768	-0.197871	0.00318596	-0.326083	0.151333	-0.126043	-0.199919
Quartz																1	-0.796428	0.685819	-0.700968	0.540405	0.0419878	-0.346709	0.302233	-0.493367	-0.229328	0.108875
Kaolinite																	1	-0.675525	0.410477	-0.711805	-0.302402	-0.00148335	-0.428079	0.409295	0.153973	-0.288199
ΣFeldspars																		1	-0.392802	0.430482	0.0721929	0.027346	0.162183	-0.269536	-0.461683	0.0171254
Illite																			1	-0.2034	0.306421	0.686195	-0.152555	0.425428	-0.302298	-0.261809
TOC																				1	0.407431	0.12216	0.676202	-0.38672	-0.151647	0.0691449
Glauconite																					1	0.263126	0.436095	-0.112752	-0.264336	-0.0463011
Smectite																						1	-0.133913	0.268307	-0.3021	-0.167525
Pyrite																							1	-0.438909	-0.139718	0.197575
Magnetite																								1	-0.0127812	-0.0810427
Siderite																									1	-0.0761477
Dolomite																										1

## Sheet: Illite Crystallinity 
Sample Depth	Width	Scale	2 Theta	Reference
504	4.53	0.192308	0.871154	Capogreco2017
573.6	2.3	0.290698	0.668605	CSR0181
596.1	1.98	0.301205	0.596386	CSR0181
665	3.51	0.181818	0.638182	Capogreco2017
688	2.7	0.198807	0.536779	NTGSRec2021
710	5.77	0.0809717	0.467206	CSR0181
735.8	5.55	0.0783699	0.434953	CSR0181
800	2.2	0.189394	0.416667	NTGSRec2021
822	2	0.189394	0.378788	NTGSRec2021
863	2.55	0.178891	0.456172	Capogreco2017
1110	2.2	0.196078	0.431373	Capogreco2017
1121.1	4.2	0.0852515	0.358056	CSR0181

## Sheet: Aromatic Hydrocarbon Data
Depth (m)	Amount extracted (g)	Sats mg	Arom mg	sats/arom	mgsats/gTOC	mgaroms/gTOC	mg HC/gTOC	TOC	MPDFI	VRc(MPDF)J	VRc(MPR)L	MPRK	DBT/PM	Temp(MPDF)	Temp(MPR)
410.55	11.14	0.4	0.2	2	5.28039	2.64019	7.92058	0.68	0.31	0.54	0.69	0.57	0	70.0923	80.7253
452.64	10.88	0.8	0.2	4	10.8131	2.70329	13.5164	0.68	0.31	0.54	0.79	0.7	0.11	70.0923	87.3525
471.24	10.62	5	0.4	12.5	41.6646	3.33317	44.9978	1.13	0.36	0.64	0.84	0.79	0.15	77.2783	90.5417
527.37	8.13	3.6	0.2	18	72.5909	4.03283	76.6237	0.61	0.33	0.56	0.75	0.64	0.06	71.5621	84.7427
569.51	8.51	22.8	2	11.4	461.931	40.5203	502.451	0.58	0.32	0.54	0.83	0.78	0.51	70.0923	89.9102
669.51	14.59	13.2	6.6	2	29.47	14.735	44.205	3.07	0.3	0.51	0.73	0.61	0.63	67.8553	83.4175
688.61	17.96	17.6	11	1.6	23.7277	14.8298	38.5576	4.13	0.32	0.55	0.79	0.7	0.64	70.8293	87.3525
750.28	20.33	10.8	3.6	3	7.75525	2.58508	10.3403	6.85	0.38	0.69	0.91	0.94	0.75	80.7253	94.8769
793.37	13.42	20.8	10.8	1.92593	20.3136	10.5474	30.861	7.63	0.39	0.7	0.95	1.03	0.55	81.4037	97.2897
812.11	8.16	8.8	3	2.93333	158.593	54.0657	212.659	0.68	0.39	0.7	0.98	1.09	0.35	81.4037	99.07
912.37	11.78	29.4	17.2	1.7093	509.338	297.98	807.318	0.49	0.47	0.89	1.05	1.3	0.79	93.6532	103.13
940.69	4.65	36.6	5	7.32	1405.53	192.012	1597.54	0.56	0.44	0.82	0.89	0.88	0.81	89.2755	93.6532
1122.4	14.77	13.4	1.6	8.375	146.33	17.4722	163.802	0.62	0.59	1.16	1.29	2.24	0.2	109.26	116.146
1203.28	8.41	0.2	5.2	0.0384615	4.32386	112.42	116.744	0.55	0.64	1.27	1.29	2.26	0.18	115.11	116.146

## Sheet: Bitumen
Well ID	Depth from (m)	Bitumen (VRE value)
		Mean	Stdev.	Minimum	Maximum	Number	PalaeoT
Altree 2	559	0.52	0.078	0.39	0.73	18	68.6053
Altree 2	573.6	0.48	0.15	0.35	0.65	4	65.5785
Altree 2	624.6	0.55	0.146	0.41	0.79	4	70.8293
Altree 2	676.2	0.34	0.06	0.25	0.42	5	54.3821
Altree 2	681.6	0.46	0.07	0.33	0.56	9	64.0378
Altree 2	712.3	0.41	0.058	0.27	0.5	25	60.1028
Altree 2	800.8	0.61	0.056	0.51	0.7	10	75.1645
Altree 2	820.8	0.68	0.117	0.48	0.86	25	80.0433
Altree 2	863.3	0.84	0.085	0.7	0.95	5	90.5417
Altree 2	922	0.9	0.09	0.67	1.1	25	94.2665
Altree 2	1060	1.33	0.18	1.04	1.81	24	118.192
Altree 2	1126.2	1.19	0.5	0.72	3.07	33	110.882

## Sheet: Calculated PalaeoT
Strat. Height (m)	Palaeo T (Tmax)	Palaeo T (Bitumen)	Palaeo T (MPDF)	Palaeo T (MPR)
394.1	69.0532
396.475	67.7047
401.195	73.0153
405.895	74.3092
410.545	83.0173
410.55			70.0923	80.7253
411.6	73.0153
411.6	73.0153
415.15	78.1141
419.855	69.0532
424.61	70.3876
429.265	70.3876
430.2	71.7082
430.2	71.7082
433.875	73.0153
438.53	75.5901
443.265	67.7047
447.95	73.0153
452.635	74.3092
452.64			70.0923	87.3525
457.055	73.0153
459.85	70.3876
459.85	70.3876
468.995	73.0153
471.235	40.6299
471.24			77.2783	90.5417
475.905	43.9373
480.645	80.5892
485.445	70.3876
490.135	69.0532
494.765	66.3419
497.5	66.3419
499.485	67.7047
504.345	64.9644
509.16	60.7406
518.05	62.1641
522.745	66.3419
527.37	67.7047
527.37			71.5621	84.7427
532.01	76.8583
536.75	64.9644
541.46	69.0532
545.975	76.8583
550.715	63.5719
555.24	80.5892
559		68.6053
559.985	76.8583
564.75	69.0532
569.505	74.3092
569.51			70.0923	89.9102
573.6		65.5785
574.4	78.1141
579.02	69.0532
583.485	76.8583
588.245	64.9644
593.09	80.5892
597.905	67.7047
602.765	76.8583
607.595	78.1141
610	71.7082
612.34	78.1141
617.12	69.0532
621.84	70.3876
624.6		70.8293
626.555	69.0532
631.295	70.3876
636.115	73.0153
640.98	70.3876
645.75	69.0532
650.495	76.8583
655.27	67.7047
661.975	76.8583
664.685	70.3876
669.51	73.0153
669.51			67.8553	83.4175
674.32	74.3092
676.2		54.3821
679.11	75.5901
681.6		64.0378	70.8293	87.3525
682.07	74.3092
682.07	74.3092
688.61	76.8583
688.61
695.35	74.3092
697.9	78.1141
700.45	79.3576
707.305	73.0153
712.3		60.1028
722.045	71.7082
731.535	71.7082
736.33	76.8583
746.02	69.0532
746.5	74.3092
746.5	74.3092
750.275	79.3576
750.28			80.7253	94.8769
754.96	79.3576
760.325	73.0153
765.29	70.3876
769.64	71.7082
783.81	73.0153
793.365	75.5901
793.37			81.4037	97.2897
800.8		75.1645
802.74	75.5901
812.11	81.809
812.11			81.4037	99.07
814.4	84.2143
820.7	81.809
820.8		80.0433
821.78	83.0173
824.2	76.8583
831.205	80.5892
831.63	66.3419
831.63	66.3419
845.475	76.8583
850	87.7395
850	73.0153
850	73.0153
854.93	76.8583
863.3		90.5417
863.6	70.3876
864.5	76.8583
873.765	79.3576
876.25	79.3576
879.9	22.6738
879.9	83.0173
879.9	83.0173
883.625	71.7082
898.25	71.7082
912.365	38.9436
912.37			93.6532	103.13
918.77	40.6299
918.77	40.6299
922		94.2665
922.045	81.809
924.9	70.3876
926.5	79.3576
926.5	79.3576
926.59	62.1641
931.525	78.1141
935.6	78.1141
935.6	78.1141
940.685	80.5892
940.69			89.2755	93.6532
945.5	66.3419
945.5	66.3419
950.64	103.016
950.64	103.631
957.65	87.7395
957.65	93.8498
983.375	98.834
983.38	94.291
1002.46	100.942
1040.86	133.928
1040.86	130.241
1055.15	97.7669
1060		118.192
1088.21	93.407
1117.47	108.057
1122.4	143.27
1122.4	98.7277
1122.4			109.26	116.146
1126.2		110.882
1127.1	92.2934
1131.74	95.6055
1141.41	80.5892
1141.42	119.946
1150.62	126.445
1150.63	133.524
1155.43	111.953
1155.43	122.708
1164.9	136.329
1174.62	127.298
1174.62	137.355
1193.67	126.445
1193.68	139.538
1203.28	108.057
1203.28			115.11	116.146
1208.1	138.685
1220.65	129.825
1220.65	143.12

[truncated: 2 more sheets: RbSr Geochronological Data, Laser Elemental Data]
