# Supplementary material for: Constraining the geothermal parameters of in situ Rb–Sr dating on Proterozoic shales and their subsequent applications
Source: Copernicus journal article supplement (doi:10.5194/gchron-4-577-2022), 2022-09-06
Supplement: Supplementary file 2 [file gchron-4-577-2022-supplement.zip]

Archive with 5 entries (5 files):
- gchron-4-577-2022-supplement-title-page.pdf
- Altree 2 XRD Spectra.pdf
- SuppFig 1.jpg
- Supplementary Dataset.xlsx
- Supplementary Material.docx
