# Supplementary material for: Constraining the geothermal parameters of in situ Rb–Sr dating on Proterozoic shales and their subsequent applications
Source: Copernicus journal article supplement (doi:10.5194/gchron-4-577-2022), 2022-09-06
Supplement: Supplementary file 2 [file gchron-4-577-2022-supplement.zip › gchron-4-577-2022-supplement-title-page.pdf]

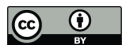

## *Supplement of*

# **Constraining the geothermal parameters of in situ Rb–Sr dating on Proterozoic shales and their subsequent applications**

**Darwinaji Subarkah et al.**

*Correspondence to:* Darwinaji Subarkah ([darwinaji.subarkah@adelaide.edu.au](mailto:darwinaji.subarkah@adelaide.edu.au))

- [gchron-4-577-2022-supplement-title-page.pdf](#)
- [Altree 2 XRD Spectra.pdf](#)
- [SuppFig 1.jpg](#)
- [Supplementary Dataset.xlsx](#)
- [Supplementary Material.docx](#)

The copyright of individual parts of the supplement might differ from the article licence.
