# Supplementary figures and images for: Constraining the geothermal parameters of in situ Rb–Sr dating on Proterozoic shales and their subsequent applications
Source: Copernicus journal article supplement (doi:10.5194/gchron-4-577-2022), 2022-09-06

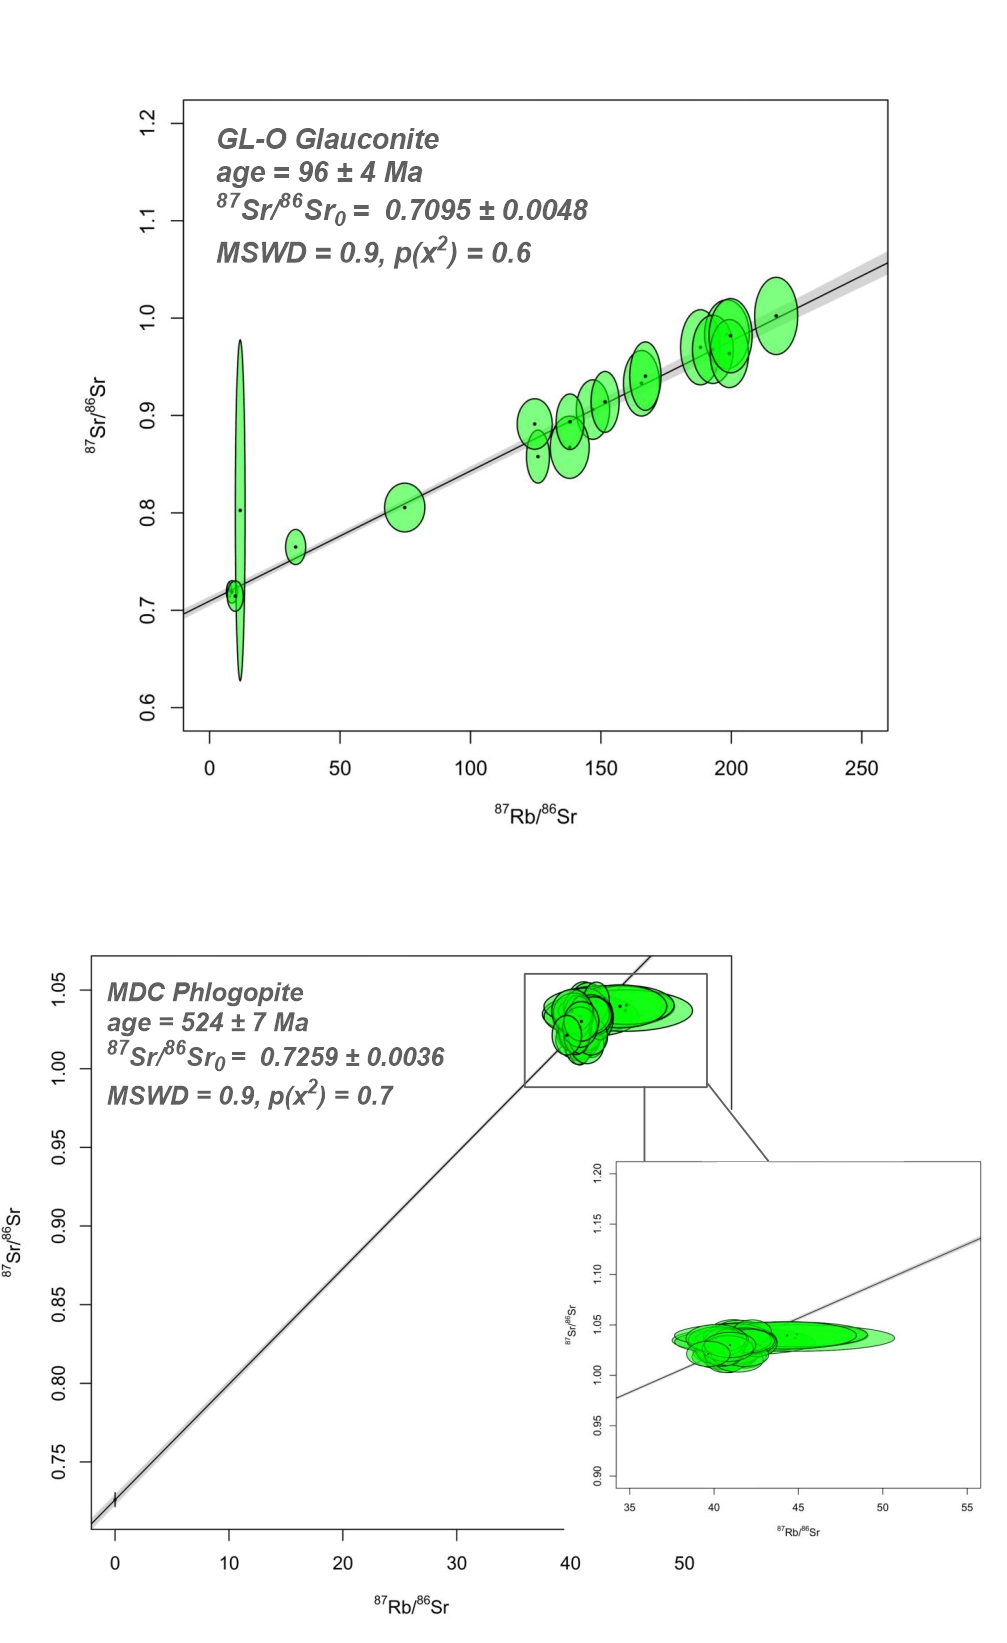

Supplement: Supplementary file 2 [file gchron-4-577-2022-supplement.zip › SuppFig 1.jpg]
